# Supplementary material for: Reducing achievement gaps in undergraduate general chemistry could lift underrepresented students into a “hyperpersistent zone”
Source: PubMed Central journal article supplement — Sci Adv. 2020 Jun 10;6(24):eaaz5687. doi: 10.1126/sciadv.aaz5687 (PMC7286681; doi:10.1126/sciadv.aaz5687), 2020-06-10
Supplement: aaz5687_SM.pdf [file aaz5687_SM.pdf]

## Supplementary Materials for

### **Reducing achievement gaps in undergraduate general chemistry could lift underrepresented students into a “hyperpersistent zone”**

R. B. Harris, M.R. Mack, J. Bryant, E. J. Theobald, S. Freeman\*

\*Corresponding author. Email: [srf991@uw.edu](mailto:srf991@uw.edu)

Published 10 June 2020, *Sci. Adv.* **6**, eaaz5687 (2020)

DOI: [10.1126/sciadv.aaz5687](https://doi.org/10.1126/sciadv.aaz5687)

#### **This PDF file includes:**

Supplementary Materials and Methods

Supplementary analyses

Figs. S1 to S3

Tables S1 to S6

References

- *Course grade.* We excluded students who took hardship withdrawals or exercised the credit/no-credit grading option.
- *Total SAT score.* When possible, we used SAT scores. However, 8.25% of students only took the ACT, in which case we converted ACT scores to SAT scores using concordance tables published by the College Board. If students took college entrance exams multiple times, we used the highest scores obtained.
- *Rank.* The University of Washington hires instructors of record in chemistry in one of three categories: 1) Tenure-track faculty who are hired and promoted primarily on the basis of their research productivity, 2) Lecturers who are not eligible for tenure but have full-time, often multi-year appointments and who are hired and promoted solely on the basis of teaching responsibilities, and 3) Temporary and often part-time instructors who are hired to teach one or two sections of a course in one or two quarters only.
- *Student evaluation of teaching scores (SETs).* For each instructor in each section, we used the composite score calculated by the University's Office of Educational Assessment from four sub-scores recorded in the UW's standard end-of-course student evaluation of teaching form. This score is intended to be an overall indicator of students' assessment of the quality of the course and instruction.

### ***Missing data and sample sizes***

Of the 25,768 unique students included in our dataset, 1.15% were missing URM status, 0% were missing EOP status, 0.03% were missing binary gender status, and 0.6% were missing parental education information.

For calculations using binary gender status, there were 72,906 observations which constituted 24,800 unique students. For calculations using URM status, there were 70,542 observations

constituting 23,992 unique students. For calculations using FGN status, there were 71,696 observations constituting 24,382 unique students. For calculations using SES status, there were 72,965 observations constituting 24,821 unique students.

**Table S1. Description of the final dataset.**

| <b>Data field</b>         | <b>Short ID</b> | <b>Description</b>                                                                                 | <b>Range of values</b>                                        | <b>Example</b>    |
|---------------------------|-----------------|----------------------------------------------------------------------------------------------------|---------------------------------------------------------------|-------------------|
| <i>Course Data</i>        |                 |                                                                                                    |                                                               |                   |
| Course year               | Year            | Numeric field indicating the year the course was taken                                             | 2001-2016                                                     | 2013              |
| Course quarter            | Quarter         | Numeric field indicating the quarter the course was taken                                          | 1 = winter; 2 = spring; 3 = summer; 4 = autumn                | 1                 |
| Course section            | Section         | Character field indicating the particular section of a course taken                                | < unique combination of course code, section, year, quarter > | CHEM.120_A_2013_1 |
| <i>Student Data</i>       |                 |                                                                                                    |                                                               |                   |
| Student number            | Student         | Unique student identifier                                                                          | < all unique >                                                | 123456            |
| Socioeconomic status      | SES             | Binary field indicating student's SES status                                                       | 0 = Higher-SES; 1 = Low-SES                                   | 0                 |
| Underrepresented minority | URM             | Binary field indicating student's URM status.                                                      | 0 = non-URM; 1 = URM student                                  | 1                 |
| First-generation student  | FGN             | Binary field indicating student's first-generation status                                          | 0 = nonFGN; 1 = FGN student                                   | 1                 |
| Gender                    | Gender          | Binary field indicating student's gender.                                                          | 0 = male; 1= female                                           | 0                 |
| Course grade              | Grade           | Field indicating the grade earned in a particular course.                                          | numeric grade on 4.0 scale                                    | 3.5               |
|                           |                 |                                                                                                    | withdrawal, can be 'normal' or 'hardship' withdrawal          | 'W'               |
|                           |                 |                                                                                                    | credit/no-credit option                                       | S                 |
| Total SAT score           | SATtotal        | Numeric field indicating the student's combined math and verbal SAT scores.                        | 0-1600                                                        | 1420              |
| <i>Instructor Data</i>    |                 |                                                                                                    |                                                               |                   |
| Name                      | Instructor      | Character field with instructor name                                                               | <unique identifiers>                                          | John Smith        |
| Rank                      | Rank            | Character field with instructor rank                                                               | Professor, Lecturer, or Temp                                  | Temp              |
| Gender                    | Gender          | Binary field with instructor gender                                                                | 0 = male; 1= female                                           | 0                 |
| Student evaluation scores | SET             | Numeric field giving average student evaluation score for a given course                           | 1.9-5.2                                                       | 3.6               |
| Teaching Award            | Award           | Binary field indicating whether instructor has ever received the 'UW Distinguished Teaching Award' | 0 = has not received; 1 = has received                        | 0                 |

## Supplementary analyses

### *Achievement gap models*

Fig. S1 reports raw achievement gaps and achievement gaps controlled for SAT and high school GPA (“HSGPA” in the figure), for all four student subgroups and all six courses included in this study. A value of 0.0 indicates no difference in final course grade between the students of interest and the appropriate comparison group (e.g. women versus men). Notches in the box plots indicate 95% confidence intervals. The data in the “GenChem.1” panel of fig. S1 are also reported in Fig. 1. The means and standard deviations for all four student subgroups and six courses analyzed are reported in table S2A, with coefficients for models for all four student subgroups and all six courses reported in table S2B.

The data in Fig. S1 suggest that there is a fundamental change in the nature of the gendered gap in general chemistry versus organic chemistry. The two course series are considered conceptually distinct, with general chemistry being more quantitative and theory-driven and organic chemistry emphasizing the three-dimensional relationships of atoms and the impact of spatial relationships on reaction mechanisms. If so, then well-documented gendered differences in spatial reasoning performance may help explain why gendered gaps are higher in organic chemistry (40). In preliminary support of this hypothesis, we note that gendered gaps also widen in the third course in the general chemistry sequence, which features several topics that rely heavily on spatial reasoning: molecular orbital theory, hybrid orbital theory, and an introduction to organic chemistry. If the hypothesis is supported by additional work, the result would promote the use of interventions to boost spatial reasoning skills in women.

We can propose three non-mutually exclusive hypotheses to explain the observation that URM and EOP students underperform in general chemistry but perform at or above their predicted level in organic chemistry: 1) URM and EOP students have learned how to cope with

the emotional and psychological causes of underperformance by the time they get to organic chemistry; 2) the students who struggle the most with those emotional and psychological causes in general chemistry are no longer in the dataset by the time students get to organic; or 3) our indices of academic preparation in high school “decay” and become less predictive over time. All three hypotheses deserve testing.

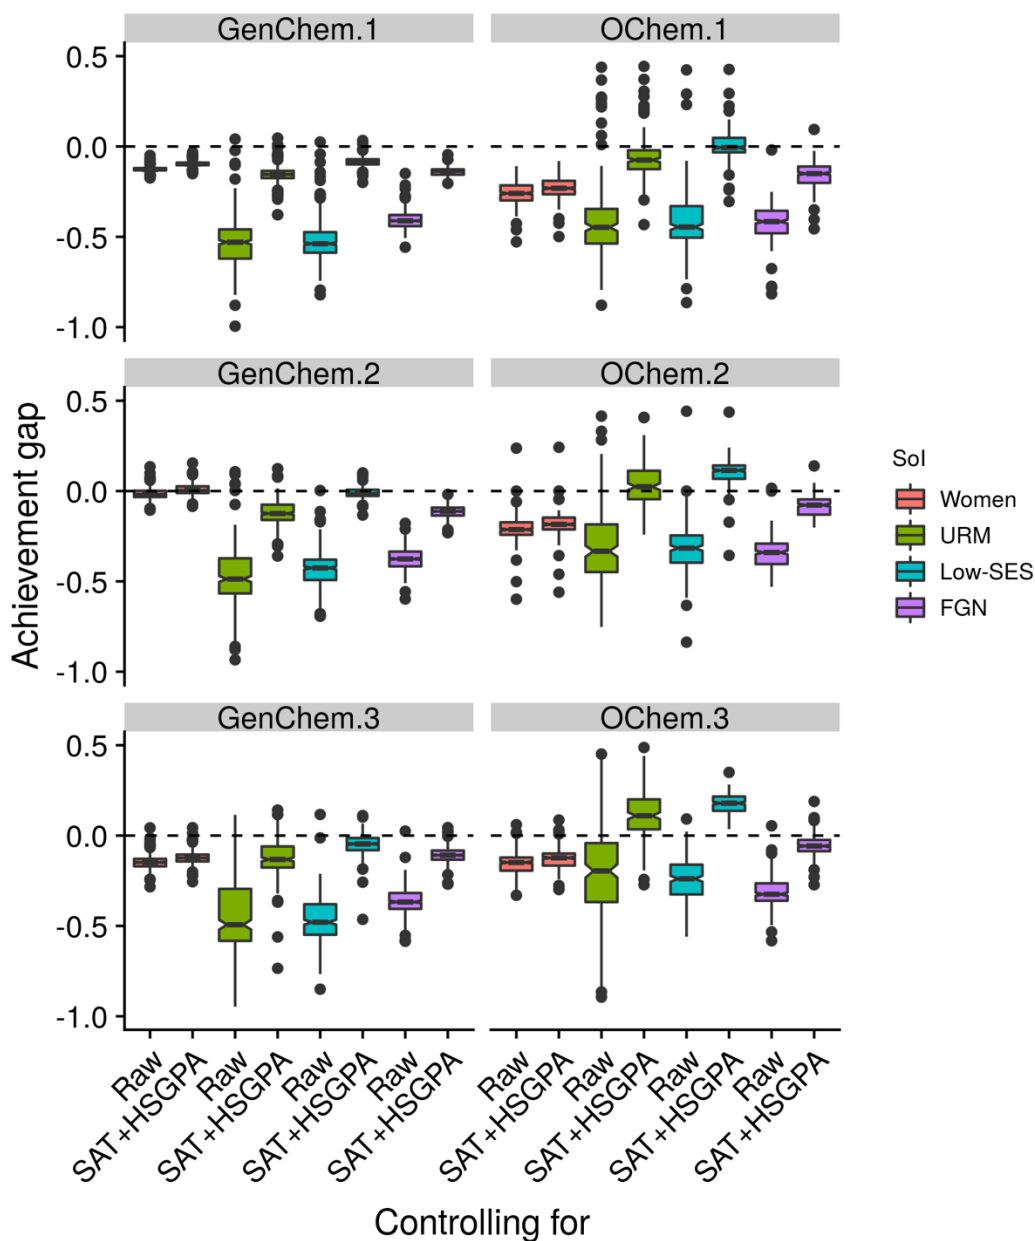

**Fig. S1. Achievement gaps by student subgroup in GenChem and OChem.**

In the legend, “SoI” stands for Student of Interest.

**Table S2. Summary data from achievement gaps analyses.**

A. Means and standard deviations (in parentheses) of achievement gaps shown in fig. S1. The coefficients used to calculate these achievement gaps are shown in table S2b.

| <b>Data</b>        | <b>Course</b> | <b>Women</b>   | <b>URM</b>     | <b>Low-SES</b> | <b>FGN</b>     |
|--------------------|---------------|----------------|----------------|----------------|----------------|
| <b>Raw</b>         | GenChem1      | -0.125 (0.018) | -0.536 (0.173) | -0.512 (0.137) | -0.403 (0.06)  |
|                    | GenChem2      | -0.011 (0.038) | -0.481 (0.206) | -0.439 (0.127) | -0.375 (0.072) |
|                    | GenChem3      | -0.144 (0.05)  | -0.497 (0.253) | -0.482 (0.165) | -0.361 (0.093) |
|                    | OChem1        | -0.265 (0.069) | -0.395 (0.307) | -0.411 (0.237) | -0.429 (0.124) |
|                    | OChem2        | -0.209 (0.107) | -0.328 (0.283) | -0.329 (0.209) | -0.331 (0.107) |
|                    | OChem3        | -0.144 (0.075) | -0.228 (0.309) | -0.252 (0.14)  | -0.315 (0.108) |
| <b>SAT + HSGPA</b> | GenChem1      | -0.096 (0.02)  | -0.157 (0.06)  | -0.084 (0.031) | -0.138 (0.027) |
|                    | GenChem2      | 0.011 (0.037)  | -0.125 (0.081) | -0.013 (0.037) | -0.115 (0.037) |
|                    | GenChem3      | -0.12 (0.05)   | -0.134 (0.13)  | -0.057 (0.075) | -0.107 (0.058) |
|                    | OChem1        | -0.236 (0.068) | -0.05 (0.157)  | 0.005 (0.109)  | -0.164 (0.084) |
|                    | OChem2        | -0.183 (0.102) | 0.022 (0.158)  | 0.092 (0.102)  | -0.078 (0.067) |
|                    | OChem3        | -0.119 (0.072) | 0.1 (0.149)    | 0.171 (0.066)  | -0.057 (0.078) |

B. Coefficients for all achievement gap models. These coefficients were used to calculate the achievement gaps detailed above in Table S2a and are plotted in Fig 1.

| Variable                 | Raw      |      |         |          | SAT+HSGPA |      |         |          |
|--------------------------|----------|------|---------|----------|-----------|------|---------|----------|
|                          | Estimate | S.E. | t-value | p-value  | Estimate  | S.E. | t-value | p-value  |
| <b>Gender Comparison</b> |          |      |         |          |           |      |         |          |
| Intercept                | 0.05     | 0.02 | 3.43    | 0.001    | 0.04      | 0.02 | 2.52    | 0.012    |
| Gender                   | -0.13    | 0.01 | -9.42   | < 2e-16  | -0.10     | 0.01 | -7.91   | 2.60e-15 |
| GenChem-2                | -0.18    | 0.02 | -8.77   | < 2e-16  | -0.18     | 0.02 | -7.89   | 2.28e-14 |
| GenChem-3                | -0.23    | 0.02 | 10.34   | < 2e-16  | -0.23     | 0.02 | -9.49   | < 2e-16  |
| OChem-1                  | -0.26    | 0.02 | 10.54   | < 2e-16  | -0.26     | 0.03 | -9.99   | < 2e-16  |
| OChem-2                  | -0.34    | 0.03 | 13.37   | < 2e-16  | -0.34     | 0.03 | -12.54  | < 2e-16  |
| OChem-3                  | -0.40    | 0.02 | 15.84   | < 2e-16  | -0.40     | 0.03 | -14.77  | < 2e-16  |
| Gender*GenChem-2         | 0.09     | 0.01 | 7.39    | 1.54e-13 | 0.09      | 0.01 | 66.47   | < 2e-16  |
| Gender*GenChem-3         | -0.03    | 0.01 | -2.23   | 0.026    | -0.04     | 0.01 | 53.10   | < 2e-16  |
| Gender*OChem-1           | -0.14    | 0.02 | -8.76   | < 2e-16  | -0.14     | 0.02 | 7.02    | 2.28e-12 |
| Gender*OChem-2           | -0.10    | 0.02 | -5.66   | 1.51e-08 | -0.10     | 0.02 | -2.60   | 0.009    |
| Gender*OChem-3           | -0.03    | 0.02 | -1.82   | 0.068    | -0.04     | 0.02 | -8.96   | < 2e-16  |
| SAT                      | NA       | NA   | NA      | NA       | 0.002     | 0.0  | -5.87   | 4.48e-09 |
| HSGPA                    | NA       | NA   | NA      | NA       | 0.29      | 0.0  | -2.07   | 0.038    |
| <b>URM Comparison</b>    |          |      |         |          |           |      |         |          |
| Intercept                | 0.04     | 0.01 | 2.93    | 0.003    | 0.01      | 0.01 | 0.46    | 0.65     |
| URM                      | -0.56    | 0.02 | 24.74   | < 2e-16  | -0.16     | 0.02 | -7.93   | 2.27e-15 |
| GenChem-2                | -0.13    | 0.02 | -6.58   | 1.69e-10 | -0.13     | 0.02 | -5.97   | 5.33e-09 |
| GenChem-3                | -0.25    | 0.02 | 11.95   | < 2e-16  | -0.25     | 0.02 | -11.00  | < 2e-16  |
| OChem-1                  | -0.34    | 0.02 | 14.86   | < 2e-16  | -0.35     | 0.02 | -13.91  | < 2e-16  |
| OChem-2                  | -0.41    | 0.02 | 16.83   | < 2e-16  | -0.41     | 0.03 | -15.68  | < 2e-16  |
| OChem-3                  | -0.44    | 0.02 | 18.46   | < 2e-16  | -0.44     | 0.03 | -17.13  | < 2e-16  |
| URM*GenChem-2            | 0.03     | 0.02 | 1.34    | 0.179    | 0.02      | 0.02 | 1.15    | 0.252    |
| URM*GenChem-3            | 0.01     | 0.02 | 0.52    | 0.600    | 0.01      | 0.02 | 0.41    | 0.685    |
| URM*OChem-1              | 0.08     | 0.02 | 3.00    | 0.003    | 0.08      | 0.03 | 2.91    | 0.004    |
| URM*OChem-2              | 0.16     | 0.03 | 5.28    | 1.32e-07 | 0.16      | 0.03 | 5.22    | 1.82e-07 |
| URM*OChem-3              | 0.23     | 0.03 | 7.23    | 4.98e-13 | 0.23      | 0.03 | 7.21    | 5.5e-13  |
| SAT                      | NA       | NA   | NA      | NA       | 0.002     | 0.0  | 66.034  | < 2e-16  |



|                       |       |      |            |          |       |      |            |              |
|-----------------------|-------|------|------------|----------|-------|------|------------|--------------|
| HSGPA                 | NA    | NA   | NA         | NA       | 0.27  | 0.0  | 50.36<br>4 | < 2e-<br>16  |
| <b>SES Comparison</b> |       |      |            |          |       |      |            |              |
| Intercept             | 0.09  | 0.01 | 6.35       | 4.71e-10 | 0.01  | 0.01 | 0.49       | 0.625        |
| SES                   | -0.54 | 0.02 | -<br>31.57 | < 2e-16  | -0.08 | 0.02 | -5.2       | 2.02e-<br>07 |
| GenChem-2             | -0.15 | 0.02 | -7.23      | 2.72e-12 | -0.15 | 0.02 | -6.66      | 8.99e-<br>11 |
| GenChem-3             | -0.26 | 0.02 | -<br>12.17 | < 2e-16  | -0.26 | 0.02 | -11.36     | < 2e-<br>16  |
| OChem-1               | -0.36 | 0.02 | -<br>15.21 | < 2e-16  | -0.36 | 0.02 | -14.48     | < 2e-<br>16  |
| OChem-2               | -0.43 | 0.02 | -<br>17.77 | < 2e-16  | -0.44 | 0.03 | -16.83     | < 2e-<br>16  |
| OChem-3               | -0.47 | 0.02 | -<br>19.78 | < 2e-16  | -0.47 | 0.02 | -18.65     | < 2e-<br>16  |
| SES*GenChem-2         | 0.08  | 0.02 | 4.84       | 1.28e-06 | 0.07  | 0.01 | 4.28       | 1.86e-<br>05 |
| SES*GenChem-3         | 0.05  | 0.02 | 2.64       | 0.008    | 0.04  | 0.02 | 2.00       | 0.045        |
| SES*OChem-1           | 0.11  | 0.02 | 5.22       | 1.82e-07 | 0.09  | 0.02 | 4.66       | 3.14e-<br>06 |
| SES*OChem-2           | 0.22  | 0.02 | 10.14      | < 2e-16  | 0.20  | 0.02 | 9.63       | < 2e-<br>16  |
| SES*OChem-3           | 0.29  | 0.02 | 12.57      | < 2e-16  | 0.27  | 0.02 | 12.07      | < 2e-<br>16  |
| SAT                   | NA    | NA   | NA         | NA       | 0.003 | 0.0  | 64.54      | < 2e-<br>16  |
| HSGPA                 | NA    | NA   | NA         | NA       | 0.28  | 0.0  | 51.52      | < 2e-<br>16  |
| <b>FGN Comparison</b> |       |      |            |          |       |      |            |              |
| Intercept             | 0.14  | 0.01 | 9.34       | < 2e-16  | 0.04  | 0.02 | 2.50       | 0.013        |
| FGN                   | -0.41 | 0.01 | -<br>29.01 | < 2e-16  | -0.14 | 0.01 | -10.70     | < 2e-<br>16  |
| GenChem-2             | -0.14 | 0.02 | -6.86      | 2.65e-11 | -0.14 | 0.02 | -6.28      | 8.76e-<br>10 |
| GenChem-3             | -0.26 | 0.02 | -12.1      | < 2e-16  | -0.26 | 0.02 | -11.27     | < 2e-<br>16  |
| OChem-1               | -0.33 | 0.02 | -<br>13.97 | < 2e-16  | -0.34 | 0.02 | -13.3      | < 2e-<br>16  |
| OChem-2               | -0.41 | 0.02 | -<br>16.71 | < 2e-16  | -0.42 | 0.03 | -15.80     | < 2e-<br>16  |
| OChem-3               | -0.44 | 0.02 | -<br>18.32 | < 2e-16  | -0.45 | 0.03 | -17.30     | < 2e-<br>16  |
| FGN*GenChem-2         | 0.03  | 0.01 | 1.93       | 0.054    | 0.02  | 0.01 | 1.876      | 0.061        |
| FGN*GenChem-3         | 0.03  | 0.01 | 2.01       | 0.045    | 0.03  | 0.01 | 2.036      | 0.042        |
| FGN*OChem-1           | 0.00  | 0.02 | -0.23      | 0.817    | 0.00  | 0.02 | -0.112     | 0.911        |
| FGN*OChem-2           | 0.07  | 0.02 | 3.81       | 0.0001   | 0.07  | 0.02 | 4.067      | 4.8e-05      |
| FGN*OChem-3           | 0.09  | 0.02 | 4.84       | 1.30e-06 | 0.09  | 0.02 | 5.110      | 3.2e-07      |
| SAT                   | NA    | NA   | NA         | NA       | 0.002 | 0.0  | 62.15<br>0 | < 2e-<br>16  |
| HSGPA                 | NA    | NA   | NA         | NA       | 0.283 | 0.0  | 52.28<br>9 | < 2e-<br>16  |

***Instructor characteristics as predictors of achievement gaps***

Table S3A provides the regression coefficients for models where an instructor characteristic had a statistically significant impact on the size of achievement gaps. Table S3B provides model selection statistics for the instructor characteristics analysis.

**Table S3. Summary data from instructor characteristics analyses.**

A. Regression coefficients.

| Comparison           | Final model                    | Variable  | Estimate | S.E.  | t-value | p-value |
|----------------------|--------------------------------|-----------|----------|-------|---------|---------|
| URM vs. Non-URM      | $Gap \sim Gender + (1 course)$ | Intercept | -0.043   | 0.043 | -1.001  | 0.36    |
|                      |                                | Gender    | -0.02    | 0.010 | -1.927  | 0.05    |
| URM vs. Non-URM      | $Gap \sim SET + (1 course)$    | Intercept | 0.039    | 0.053 | 0.727   | 0.48    |
|                      |                                | SET       | -0.023   | 0.007 | -3.03   | 0.003   |
| URM vs. Non-URM      | $Gap \sim Award + (1 course)$  | Intercept | -0.043   | 0.043 | -1.001  | 0.363   |
|                      |                                | Award     | -0.034   | 0.013 | -2.673  | 0.007   |
| Low-SES vs. High-SES | $Gap \sim Award + (1 course)$  | Intercept | 0.024    | 0.039 | 0.62    | 0.562   |
|                      |                                | Award     | -0.019   | 0.007 | -2.685  | 0.007   |
| FGN vs. Non-FGN      | $Gap \sim Award + (1 course)$  | Intercept | -0.106   | 0.015 | -6.816  | 0.001   |
|                      |                                | Award     | -0.015   | 0.006 | -2.412  | 0.012   |

B. Model selection statistics. “Step” refers to the sequence in stepwise selection. SoI stands for Students of Interest. In the columns that specify models, variables that follow the form (1|StudentNo) indicate a random effect, with all other terms being fixed effects. “AICc” is the value of the Akaike Information Criterion with the small-sample size correction; “delta” indicates the magnitude of the difference between the model in the row and the model with the smallest AICc. Other terms are explained in the text.

| Instr. trait | Full model                                                                                                     | Step     | SoI                                | Model                                                                              | df       | logLik        | AICc           | delta       | weight      |
|--------------|----------------------------------------------------------------------------------------------------------------|----------|------------------------------------|------------------------------------------------------------------------------------|----------|---------------|----------------|-------------|-------------|
| Gender       | Women's achievement gap<br>~ instructor gender + (1   instructor) + (1   year) + (1   course) + (1   quarter)  | 1        | Women                              | ~ instructor gender + (1   instructor) + (1   course)                              | 5        | 750.18        | -1490.2        | 0.00        | 0.44        |
|              |                                                                                                                | 1        | Women                              | ~ instructor gender + (1   instructor) + (1   year) + (1   course)                 | 6        | 750.18        | -1488.2        | 2.03        | 0.16        |
|              |                                                                                                                | 2        | Women                              | ~ instructor gender + (1   instructor) + (1   course)                              | 5        | 756.77        | -1503.4        | 0.00        | 1.00        |
|              |                                                                                                                | 2        | Women                              | ~ instructor gender                                                                | 3        | 469.53        | -933.0         | 570.42      | 0.00        |
|              |                                                                                                                | <b>3</b> | <b>Women</b>                       | <b>~ 1 + (1   course) + (1   instructor)</b>                                       | <b>4</b> | <b>754.09</b> | <b>-1500.1</b> | <b>0.00</b> | <b>0.99</b> |
|              |                                                                                                                | 3        | Women                              | ~ instructor gender + (1   course) + (1   instructor)                              | 5        | 750.18        | -1490.2        | 9.86        | 0.01        |
|              | URM's achievement gap<br>~ instructor gender + (1   instructor) + (1   year) + (1   course) + (1   quarter)    | 1        | URM                                | ~ instructor gender + (1   instructor) + (1   course)                              | 5        | 366.62        | -723.1         | 0.00        | 0.20        |
|              |                                                                                                                | 1        | URM                                | ~ instructor gender + (1   instructor) + (1   course) + (1   quarter)              | 6        | 367.50        | -722.8         | 0.28        | 0.17        |
|              |                                                                                                                | 1        | URM                                | ~ instructor gender + (1   instructor) + (1   year) + (1   course)                 | 6        | 367.46        | -722.7         | 0.37        | 0.16        |
|              |                                                                                                                | 1        | URM                                | (1   instructor) + (1   year) + (1   course) + (1   quarter) ~ instructor gender + | 7        | 368.43        | -722.6         | 0.50        | 0.15        |
|              |                                                                                                                | 1        | URM                                | ~ instructor gender + (1   year) + (1   course)                                    | 5        | 366.03        | -721.9         | 1.18        | 0.11        |
|              |                                                                                                                | 1        | URM                                | ~ instructor gender + (1   course)                                                 | 4        | 364.74        | -721.4         | 1.72        | 0.08        |
|              |                                                                                                                | 1        | URM                                | ~ instructor gender + (1   year) + (1   course) + (1   quarter)                    | 6        | 366.62        | -721.1         | 2.05        | 0.07        |
|              |                                                                                                                | 2        | URM                                | ~ instructor gender + (1   course)                                                 | 4        | 370.58        | -733.1         | 0.00        | 1.00        |
|              |                                                                                                                | 2        | URM                                | ~ instructor gender                                                                | 3        | 259.80        | -513.6         | 219.53      | 0.00        |
|              |                                                                                                                | <b>3</b> | <b>URM</b>                         | <b>~ instructor gender + (1   course)</b>                                          | <b>4</b> | <b>364.74</b> | <b>-721.4</b>  | <b>0.00</b> | <b>1.00</b> |
|              | LowSES's achievement gap<br>~ instructor gender + (1   instructor) + (1   year) + (1   course) + (1   quarter) | 1        | LowSES                             | ~ instructor gender + (1   course)                                                 | 4        | 671.52        | -1334.9        | 0.00        | 0.32        |
|              |                                                                                                                | 1        | LowSES                             | ~ instructor gender + (1   instructor) + (1   course)                              | 5        | 672.13        | -1334.1        | 0.82        | 0.21        |
|              |                                                                                                                | 1        | LowSES                             | ~ instructor gender + (1   course) + (1   quarter)                                 | 5        | 671.56        | -1333.0        | 1.96        | 0.12        |
|              |                                                                                                                | 1        | LowSES                             | ~ instructor gender + (1   year) + (1   course)                                    | 5        | 671.52        | -1332.9        | 2.03        | 0.12        |
|              |                                                                                                                | 2        | LowSES                             | ~ instructor gender + (1   course)                                                 | 4        | 678.05        | -1348.0        | 0.00        | 1.00        |
|              |                                                                                                                | 2        | LowSES                             | ~ instructor gender                                                                | 3        | 429.96        | -853.9         | 494.15      | 0.00        |
|              |                                                                                                                | <b>3</b> | <b>LowSES</b>                      | <b>~ 1 + (1   course)</b>                                                          | <b>3</b> | <b>673.83</b> | <b>-1341.6</b> | <b>0.00</b> | <b>0.97</b> |
|              |                                                                                                                | 3        | LowSES                             | ~ instructor gender + (1   course)                                                 | 4        | 671.52        | -1334.9        | 6.66        | 0.03        |
|              | FGN's achievement gap<br>~ instructor gender + (1   instructor) + (1   year) + (1   course) + (1   quarter)    | 1        | FGN                                | ~ instructor gender + (1   course)                                                 | 4        | 721.00        | -1433.9        | 0.00        | 0.37        |
|              |                                                                                                                | 1        | FGN                                | ~ instructor gender + (1   instructor) + (1   course)                              | 5        | 721.22        | -1432.3        | 1.61        | 0.17        |
|              |                                                                                                                | 1        | FGN                                | ~ instructor gender + (1   course) + (1   quarter)                                 | 5        | 721.00        | -1431.9        | 2.04        | 0.13        |
|              |                                                                                                                | 2        | FGN                                | ~ instructor gender + (1   course)                                                 | 4        | 728.54        | -1449.0        | 0.00        | 1.00        |
|              |                                                                                                                | 2        | FGN                                | ~ instructor gender                                                                | 3        | 664.28        | -1322.5        | 126.49      | 0.00        |
|              |                                                                                                                | <b>3</b> | <b>FGN</b>                         | <b>~ 1 + (1   course)</b>                                                          | <b>3</b> | <b>724.35</b> | <b>-1442.7</b> | <b>0.00</b> | <b>0.99</b> |
| 3            |                                                                                                                | FGN      | ~ instructor gender + (1   course) | 4                                                                                  | 721.00   | -1433.9       | 8.74           | 0.01        |             |
|              |                                                                                                                | 1        | Women                              | ~ instructor award + (1   instructor) + (1   course)                               | 5        | 823.89        | -1637.7        | 0.00        | 0.44        |

|                |                                                                                                               |                                                                                                             |               |                                                                                   |                                                                  |                 |                      |                 |             |      |
|----------------|---------------------------------------------------------------------------------------------------------------|-------------------------------------------------------------------------------------------------------------|---------------|-----------------------------------------------------------------------------------|------------------------------------------------------------------|-----------------|----------------------|-----------------|-------------|------|
| Teaching Award | Women's achievement gap<br>~ instructor award + (1   instructor) + (1   year) + (1   course) + (1   quarter)  | 1                                                                                                           | Women         | ~ instructor award + (1   instructor) + (1   year) + (1   course)                 | 6                                                                | 823.92          | -1635.7              | 1.98            | 0.16        |      |
|                |                                                                                                               | 1                                                                                                           | Women         | ~ instructor award + (1   instructor) + (1   course) + (1   quarter)              | 6                                                                | 823.89009<br>2  | -<br>1635.60698<br>8 | 2.04973<br>9086 | 0.16        |      |
|                |                                                                                                               | 2                                                                                                           | Women         | ~ instructor award + (1   course) + (1   instructor)                              | 5                                                                | 830.39345<br>13 | -<br>1650.66344<br>6 | 0               | 1.00        |      |
|                |                                                                                                               | 2                                                                                                           | Women         | ~ instructor award                                                                | 3                                                                | 489.81          | -973.6               | 677.09          | 0.00        |      |
|                |                                                                                                               | 3                                                                                                           | <b>Women</b>  | <b>~ 1 + (1   course) + (1   instructor)</b>                                      | <b>4</b>                                                         | <b>827.69</b>   | <b>-1647.3</b>       | <b>0.00</b>     | <b>0.99</b> |      |
|                |                                                                                                               | 3                                                                                                           | Women         | ~ instructor award + (1   course) + (1   instructor)                              | 5                                                                | 823.89          | -1637.7              | 9.65            | 0.01        |      |
|                | URM's achievement gap<br>~ instructor award + (1   instructor) + (1   year) + (1   course) + (1   quarter)    | 1                                                                                                           | URM           | ~ instructor award + (1   instructor) + (1   course)                              | 5                                                                | 368.56          | -727.0               | 0.00            | 0.23        |      |
|                |                                                                                                               | 1                                                                                                           | URM           | ~ instructor award + (1   instructor) + (1   year) + (1   course)                 | 6                                                                | 369.31          | -726.4               | 0.56            | 0.17        |      |
|                |                                                                                                               | 1                                                                                                           | URM           | ~ instructor award + (1   instructor) + (1   course) + (1   quarter)              | 6                                                                | 369.24          | -726.3               | 0.69            | 0.16        |      |
|                |                                                                                                               | 1                                                                                                           | URM           | ~ instructor award + (1   instructor) + (1   year) + (1   course) + (1   quarter) | 7                                                                | 370.08588<br>92 | -<br>725.935989      | 1.06624<br>1327 | 0.13        |      |
|                |                                                                                                               | 1                                                                                                           | URM           | ~ instructor award + (1   year) + (1   course)                                    | 5                                                                | 367.89641<br>37 | -<br>725.667041<br>2 | 1.33518<br>9081 | 0.12        |      |
|                |                                                                                                               | 1                                                                                                           | URM           | ~ instructor award + (1   course)                                                 | 4                                                                | 366.58          | -725.1               | 1.93            | 0.09        |      |
|                |                                                                                                               | 1                                                                                                           | URM           | ~ instructor award + (1   year) + (1   course) + (1   quarter)                    | 6                                                                | 368.32          | -724.5               | 2.55            | 0.06        |      |
|                |                                                                                                               | 2                                                                                                           | URM           | ~ instructor award + (1   course)                                                 | 4                                                                | 372.22          | -736.4               | 0.00            | 1.00        |      |
|                |                                                                                                               | 2                                                                                                           | URM           | ~ instructor award                                                                | 3                                                                | 254.14          | -502.2               | 234.13          | 0.00        |      |
|                |                                                                                                               | 3                                                                                                           | <b>URM</b>    | <b>~ instructor award + (1   course)</b>                                          | <b>4</b>                                                         | <b>366.58</b>   | <b>-725.1</b>        | <b>0.00</b>     | <b>1.00</b> |      |
|                | LowSES's achievement gap<br>~ instructor award + (1   instructor) + (1   year) + (1   course) + (1   quarter) | 1                                                                                                           | LowSES        | ~ instructor award + (1   course)                                                 | 4                                                                | 673.73          | -1339.4              | 0.00            | 0.36        |      |
|                |                                                                                                               | 1                                                                                                           | LowSES        | ~ instructor award + (1   instructor) + (1   course)                              | 5                                                                | 674.07          | -1338.0              | 1.36            | 0.18        |      |
|                |                                                                                                               | 1                                                                                                           | LowSES        | ~ instructor award + (1   year) + (1   course)                                    | 5                                                                | 673.73          | -1337.3              | 2.04            | 0.13        |      |
|                |                                                                                                               | 2                                                                                                           | LowSES        | ~ instructor award + (1   course)                                                 | 4                                                                | 680.07          | -1352.1              | 0.00            | 1.00        |      |
|                |                                                                                                               | 2                                                                                                           | LowSES        | ~ instructor award                                                                | 3                                                                | 422.74          | -839.4               | 512.64          | 0.00        |      |
|                |                                                                                                               | 3                                                                                                           | <b>LowSES</b> | <b>~ instructor award + (1   course)</b>                                          | <b>4</b>                                                         | <b>673.73</b>   | <b>-1339.4</b>       | <b>0.00</b>     | <b>1.00</b> |      |
|                | FGN's achievement gap<br>~ instructor award + (1   instructor) + (1   year) + (1   course) + (1   quarter)    | 1                                                                                                           | FGN           | ~ instructor award + (1   course)                                                 | 4                                                                | 723.44          | -1438.8              | 0.00            | 0.40        |      |
|                |                                                                                                               | 1                                                                                                           | FGN           | ~ instructor award + (1   instructor) + (1   course)                              | 5                                                                | 723.46          | -1436.8              | 2.01            | 0.15        |      |
|                |                                                                                                               | 2                                                                                                           | FGN           | ~ instructor award + (1   course)                                                 | 4                                                                | 730.80          | -1453.5              | 0.00            | 1.00        |      |
|                |                                                                                                               | 2                                                                                                           | FGN           | ~ instructor award                                                                | 3                                                                | 668.47          | -1330.9              | 122.63          | 0.00        |      |
|                |                                                                                                               | 3                                                                                                           | <b>FGN</b>    | <b>~ instructor award + (1   course)</b>                                          | <b>4</b>                                                         | <b>723.44</b>   | <b>-1438.8</b>       | <b>0.00</b>     | <b>1.00</b> |      |
|                | Rank                                                                                                          | Women's achievement gap<br>~ instructor rank + (1   instructor) + (1   year) + (1   course) + (1   quarter) | 1             | Women                                                                             | ~ instructor rank + (1   instructor) + (1   course)              | 6               | 746.99               | -1481.8         | 0.00        | 0.39 |
|                |                                                                                                               |                                                                                                             | 1             | Women                                                                             | ~ instructor rank + (1   course)                                 | 5               | 744.96               | -1479.8         | 1.99        | 0.15 |
|                |                                                                                                               |                                                                                                             | 1             | Women                                                                             | ~ instructor rank + (1   instructor) + (1   year) + (1   course) | 7               | 747.01               | -1479.8         | 2.02        | 0.14 |
| 2              |                                                                                                               |                                                                                                             | Women         | ~ instructor rank + (1   course)                                                  | 5                                                                | 755.82          | -1501.5              | 0.00            | 1.00        |      |

|      |                                                                                                              |   |               |                                                                                  |          |               |                |             |             |
|------|--------------------------------------------------------------------------------------------------------------|---|---------------|----------------------------------------------------------------------------------|----------|---------------|----------------|-------------|-------------|
|      |                                                                                                              | 2 | Women         | ~ instructor rank                                                                | 4        | 468.74        | -929.4         | 572.13      | 0.00        |
|      |                                                                                                              | 3 | <b>Women</b>  | <b>~ 1 + (1   course)</b>                                                        | <b>3</b> | <b>750.86</b> | <b>-1495.7</b> | <b>0.00</b> | <b>1.00</b> |
|      |                                                                                                              | 3 | Women         | ~ instructor rank + (1   course)                                                 | 5        | 744.96        | -1479.8        | 15.87       | 0.00        |
|      | URM's achievement gap ~ instructor rank + (1   instructor) + (1   year) + (1   course) + (1   quarter)       | 1 | URM           | ~ instructor rank + (1   year) + (1   course)                                    | 6        | 364.35        | -716.5         | 0.00        | 0.17        |
|      |                                                                                                              | 1 | URM           | ~ instructor rank + (1   instructor) + (1   course)                              | 6        | 364.28        | -716.4         | 0.15        | 0.15        |
|      |                                                                                                              | 1 | URM           | ~ instructor rank + (1   instructor) + (1   year) + (1   course)                 | 7        | 365.30        | -716.4         | 0.16        | 0.15        |
|      |                                                                                                              | 1 | URM           | ~ instructor rank + (1   instructor) + (1   course) + (1   quarter)              | 7        | 365.13        | -716.0         | 0.52        | 0.13        |
|      |                                                                                                              | 1 | URM           | ~ instructor rank + (1   instructor) + (1   year) + (1   course) + (1   quarter) | 8        | 366.12        | -715.9         | 0.59        | 0.12        |
|      |                                                                                                              | 1 | URM           | ~ instructor rank + (1   course)                                                 | 5        | 362.96        | -715.8         | 0.74        | 0.11        |
|      |                                                                                                              | 1 | URM           | ~ instructor rank + (1   year) + (1   course) + (1   quarter)                    | 7        | 364.84        | -715.4         | 1.09        | 0.10        |
|      |                                                                                                              | 1 | URM           | ~ instructor rank + (1   course) + (1   quarter)                                 | 6        | 363.43        | -714.7         | 1.86        | 0.07        |
|      |                                                                                                              | 1 | URM           | ~ instructor rank + (1   instructor) + (1   quarter)                             | 6        | 313.60        | -615.0         | 101.50      | 0.00        |
|      |                                                                                                              | 2 | URM           | ~ instructor rank + (1   course)                                                 | 5        | 372.08        | -734.0         | 0.00        | 1.00        |
|      |                                                                                                              | 2 | URM           | ~ instructor rank                                                                | 4        | 260.64        | -513.2         | 220.85      | 0.00        |
|      |                                                                                                              | 3 | <b>URM</b>    | <b>~ 1 + (1   course)</b>                                                        | <b>3</b> | <b>366.27</b> | <b>-726.5</b>  | <b>0.00</b> | <b>1.00</b> |
|      |                                                                                                              | 3 | URM           | ~ instructor rank + (1   course)                                                 | 5        | 362.96        | -715.8         | 10.68       | 0.00        |
|      | LowSES's achievement gap ~ instructor rank + (1   instructor) + (1   year) + (1   course) + (1   quarter)    | 1 | LowSES        | ~ instructor rank + (1   course)                                                 | 5        | 670.62        | -1331.1        | 0.00        | 0.37        |
|      |                                                                                                              | 1 | LowSES        | ~ instructor rank + (1   instructor) + (1   course)                              | 6        | 670.85        | -1329.5        | 1.59        | 0.17        |
|      |                                                                                                              | 1 | LowSES        | ~ instructor rank + (1   course) + (1   quarter)                                 | 6        | 670.64        | -1329.1        | 2.00        | 0.14        |
|      |                                                                                                              | 2 | LowSES        | ~ instructor rank + (1   course)                                                 | 5        | 681.04        | -1352.0        | 0.00        | 1.00        |
|      |                                                                                                              | 2 | LowSES        | ~ instructor rank                                                                | 4        | 434.51        | -860.9         | 491.03      | 0.00        |
|      |                                                                                                              | 3 | <b>LowSES</b> | <b>~ 1 + (1   course)</b>                                                        | <b>3</b> | <b>673.83</b> | <b>-1341.6</b> | <b>0.00</b> | <b>0.99</b> |
|      |                                                                                                              | 3 | LowSES        | ~ instructor rank + (1   course)                                                 | 5        | 670.62        | -1331.1        | 10.49       | 0.01        |
|      | FGN's achievement gap ~ instructor rank + (1   instructor) + (1   year) + (1   course) + (1   quarter)       | 1 | FGN           | ~ instructor rank + (1   course)                                                 | 5        | 718.62        | -1427.1        | 0.00        | 0.39        |
|      |                                                                                                              | 1 | FGN           | ~ instructor rank + (1   instructor) + (1   course)                              | 6        | 718.67        | -1425.2        | 1.93        | 0.15        |
|      |                                                                                                              | 1 | FGN           | ~ instructor rank + (1   year) + (1   course)                                    | 6        | 718.62        | -1425.1        | 2.05        | 0.14        |
|      |                                                                                                              | 2 | FGN           | ~ instructor rank + (1   course)                                                 | 5        | 730.12        | -1450.1        | 0.00        | 1.00        |
|      |                                                                                                              | 2 | FGN           | ~ instructor rank                                                                | 4        | 665.86        | -1323.6        | 126.48      | 0.00        |
|      |                                                                                                              | 3 | <b>FGN</b>    | <b>~ 1 + (1   course)</b>                                                        | <b>3</b> | <b>724.35</b> | <b>-1442.7</b> | <b>0.00</b> | <b>1.00</b> |
|      |                                                                                                              | 3 | FGN           | ~ instructor rank + (1   course)                                                 | 5        | 718.62        | -1427.1        | 15.55       | 0.00        |
| SETs | Women's achievement gap ~ student evaluations + (1   instructor) + (1   year) + (1   course) + (1   quarter) | 1 | Women         | ~ student evaluations + (1   course)                                             | 4        | 632.43        | -1256.8        | 0.00        | 0.30        |
|      |                                                                                                              | 1 | Women         | ~ student evaluations + (1   instructor) + (1   course)                          | 5        | 633.16        | -1256.2        | 0.59        | 0.22        |
|      |                                                                                                              | 1 | Women         | ~ student evaluations + (1   year) + (1   course)                                | 5        | 632.60        | -1255.0        | 1.72        | 0.13        |
|      |                                                                                                              | 1 | Women         | ~ student evaluations + (1   course) + (1   quarter)                             | 5        | 632.43        | -1254.7        | 2.05        | 0.11        |

|                                                                                                               |          |               |                                                                         |          |               |                |             |             |
|---------------------------------------------------------------------------------------------------------------|----------|---------------|-------------------------------------------------------------------------|----------|---------------|----------------|-------------|-------------|
|                                                                                                               | 2        | Women         | ~ student evaluations + (1   course)                                    | 4        | 639.51        | -1270.9        | 0.00        | 1.00        |
|                                                                                                               | 2        | Women         | ~ student evaluations                                                   | 3        | 394.23        | -782.4         | 488.53      | 0.00        |
|                                                                                                               | <b>3</b> | <b>Women</b>  | <b>~ 1 + (1   course)</b>                                               | <b>3</b> | <b>635.90</b> | <b>-1265.7</b> | <b>0.00</b> | <b>0.99</b> |
|                                                                                                               | 3        | Women         | ~ student evaluations + (1   course)                                    | 4        | 632.43        | -1256.8        | 8.98        | 0.01        |
| URM's achievement gap ~ student evaluations + (1   instructor) + (1   year) + (1   course) + (1   quarter)    | 1        | URM           | ~ student evaluations + (1   course)                                    | 4        | 352.38        | -696.7         | 0.00        | 0.22        |
|                                                                                                               | 1        | URM           | ~ student evaluations + (1   instructor) + (1   course) + (1   quarter) | 6        | 354.23        | -696.3         | 0.41        | 0.18        |
|                                                                                                               | 1        | URM           | ~ student evaluations + (1   course) + (1   quarter)                    | 5        | 353.17        | -696.2         | 0.48        | 0.17        |
|                                                                                                               | 1        | URM           | ~ student evaluations + (1   instructor) + (1   course)                 | 5        | 353.03        | -695.9         | 0.75        | 0.15        |
|                                                                                                               | 1        | URM           | ~ student evaluations + (1   year) + (1   course)                       | 5        | 352.49        | -694.8         | 1.84        | 0.09        |
|                                                                                                               | 1        | URM           | ~ student evaluations + (1   year) + (1   course) + (1   quarter)       | 6        | 353.42        | -694.6         | 2.04        | 0.08        |
|                                                                                                               | 2        | URM           | ~ student evaluations + (1   course)                                    | 4        | 358.57        | -709.0         | 0.00        | 1.00        |
|                                                                                                               | 2        | URM           | ~ student evaluations                                                   | 3        | 235.89        | -465.7         | 243.32      | 0.00        |
|                                                                                                               | <b>3</b> | <b>URM</b>    | <b>~ student evaluations + (1   course)</b>                             | <b>4</b> | <b>352.38</b> | <b>-696.7</b>  | <b>0.00</b> | <b>0.52</b> |
|                                                                                                               | 3        | URM           | ~ 1 + (1   course)                                                      | 3        | 351.27        | -696.5         | 0.18        | 0.48        |
| LowSES's achievement gap ~ student evaluations + (1   instructor) + (1   year) + (1   course) + (1   quarter) | 1        | LowSES        | ~ student evaluations + (1   course)                                    | 4        | 569.70        | -1131.3        | 0.00        | 0.32        |
|                                                                                                               | 1        | LowSES        | ~ student evaluations + (1   instructor) + (1   course)                 | 5        | 570.37        | -1130.6        | 0.71        | 0.22        |
|                                                                                                               | 1        | LowSES        | ~ student evaluations + (1   course) + (1   quarter)                    | 5        | 569.70        | -1129.3        | 2.05        | 0.11        |
|                                                                                                               | 2        | LowSES        | ~ student evaluations + (1   course)                                    | 4        | 576.44        | -1144.8        | 0.00        | 1.00        |
|                                                                                                               | 2        | LowSES        | ~ student evaluations                                                   | 3        | 350.63        | -695.2         | 449.60      | 0.00        |
|                                                                                                               | <b>3</b> | <b>LowSES</b> | <b>~ 1 + (1   course)</b>                                               | <b>3</b> | <b>572.81</b> | <b>-1139.6</b> | <b>0.00</b> | <b>0.98</b> |
|                                                                                                               | 3        | LowSES        | ~ student evaluations + (1   course)                                    | 4        | 569.70        | -1131.3        | 8.26        | 0.02        |
| FGN's achievement gap ~ student evaluations + (1   instructor) + (1   year) + (1   course) + (1   quarter)    | 1        | FGN           | ~ student evaluations + (1   course)                                    | 4        | 619.33        | -1230.6        | 0.00        | 0.40        |
|                                                                                                               | 1        | FGN           | ~ student evaluations + (1   instructor) + (1   course)                 | 5        | 619.36        | -1228.6        | 1.99        | 0.15        |
|                                                                                                               | 1        | FGN           | ~ student evaluations + (1   year) + (1   course)                       | 5        | 619.33        | -1228.5        | 2.05        | 0.14        |
|                                                                                                               | 2        | FGN           | ~ student evaluations + (1   course)                                    | 4        | 627.06        | -1246.0        | 0.00        | 1.00        |
|                                                                                                               | 2        | FGN           | ~ student evaluations                                                   | 3        | 561.90        | -1117.7        | 128.27      | 0.00        |
|                                                                                                               | <b>3</b> | <b>FGN</b>    | <b>~ 1 + (1   course)</b>                                               | <b>3</b> | <b>622.52</b> | <b>-1239.0</b> | <b>0.00</b> | <b>0.99</b> |
|                                                                                                               | 3        | FGN           | ~ student evaluations + (1   course)                                    | 4        | 619.33        | -1230.6        | 8.42        | 0.01        |

The small-to-negligible impact of instructor gender on achievement gaps reported here was surprising, as other work in STEM has shown a slight but significant impact of instructor gender on gendered gaps. The lack of correspondence between SETs and achievement gaps that we

observed has been well-documented in the literature, however (33). Extensive data on bias in SETs based on instructor gender and lack of correlation with student learning have inspired calls to abandon student evaluations of teaching in favor of evidence-based approaches (33).

### ***Risk and attrition models***

The risk of not continuing for each course in GenChem and OChem, along with attrition over time, are reported for each student subgroup in Fig. 2. Fig. S2 plots the same results, but from models that do not control for indices of academic preparation and ability (SAT and high school GPA). Table S4 provides fitted hazard and survival probability estimates without and with controls for student preparation and ability, along with regression coefficients for both models.

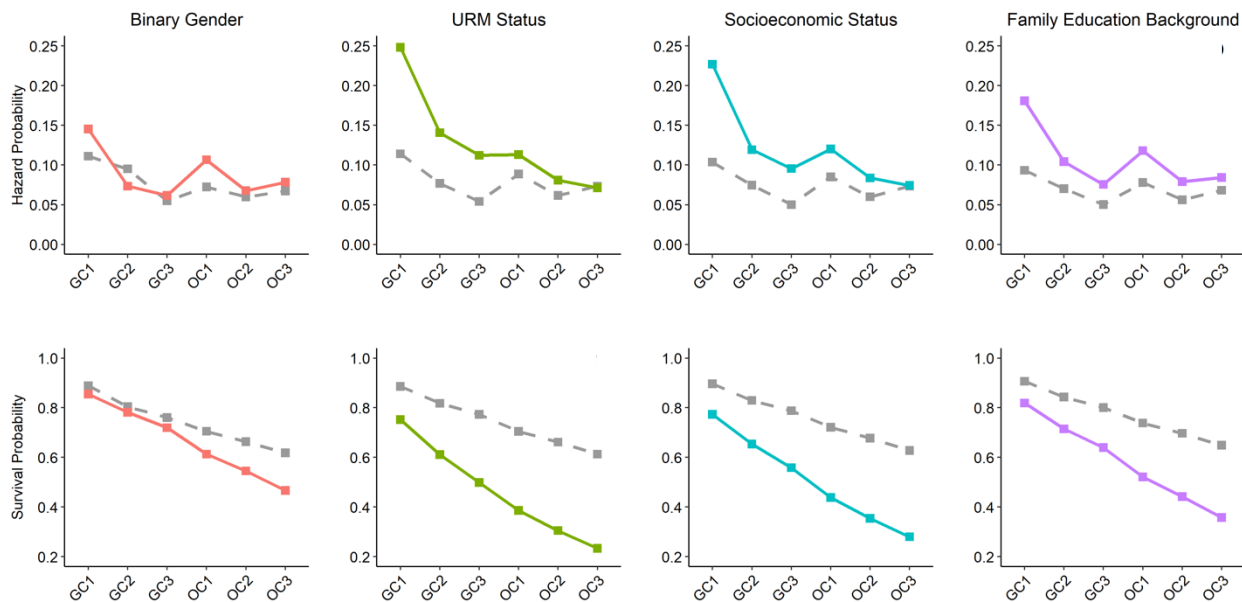

**Fig. S2. Risk by course and survival over time, not controlling for academic preparation.**

The top graph shows the actual or raw proportion of students at the beginning of each general chemistry (GC) or organic chemistry (OC) course who did not advance to the subsequent course. The bottom graph shows the actual or raw proportion of original students retained at the end of each course. In both panels, underrepresented students are represented by bold lines and well-represented students by grayed lines.



**Table S4. Summary data from risk and survival analyses.**

A. Fitted hazard and survival probability estimates with 95% confidence intervals, in brackets.

| <b>Binary Gender</b>               |                   |                   |                   |                   |
|------------------------------------|-------------------|-------------------|-------------------|-------------------|
| <b>Course</b>                      | <b>Hazard</b>     |                   | <b>Survival</b>   |                   |
|                                    | <b>Men</b>        | <b>Women</b>      | <b>Men</b>        | <b>Women</b>      |
| GenChem-1                          | .11, [.10, .12]   | .15, [.13, .16]   | .89, [.88, .90]   | .85, [.84, .87]   |
| GenChem-2                          | .10, [.08, .11]   | .07, [.06, .09]   | .80, [.80, .82]   | .78, [.77, .80]   |
| GenChem-3                          | .05, [.04, .07]   | .06, [.05, .08]   | .76, [.75, .78]   | .72, [.71, .74]   |
| OChem-1                            | .07, [.06, .09]   | .11, [.08, .14]   | .71, [.70, .72]   | .61, [.60, .64]   |
| OChem-2                            | .06, [.05, .08]   | .07, [.05, .09]   | .66, [.66, .68]   | .55, [.54, .57]   |
| OChem-3                            | .07, [.05, .09]   | .08, [.06, .11]   | .62, [.62, .64]   | .47, [.46, .49]   |
| <b>URM Status</b>                  |                   |                   |                   |                   |
| <b>Course</b>                      | <b>Hazard</b>     |                   | <b>Survival</b>   |                   |
|                                    | <b>Non-URM</b>    | <b>URM</b>        | <b>Non-URM</b>    | <b>URM</b>        |
| GenChem-1                          | .11, [.10, .13]   | .25, [.22, .28]   | .89, [.87, .90]   | .75, [.72, .78]   |
| GenChem-2                          | .08, [.06, .09]   | .14, [.11, .18]   | .82, [.81, .83]   | .61, [.59, .65]   |
| GenChem-3                          | .05, [.04, .07]   | .11, [.08, .15]   | .77, [.77, .79]   | .50, [.49, .53]   |
| OChem-1                            | .09, [.07, .11]   | .11, [.08, .16]   | .70, [.70, .72]   | .39, [.38, .42]   |
| OChem-2                            | .06, [.05, .08]   | .08, [.05, .12]   | .66, [.66, .68]   | .30, [.30, .33]   |
| OChem-3                            | .07, [.06, .09]   | .07, [.04, .11]   | .61, [.61, .63]   | .23, [.23, .26]   |
| <b>Socioeconomic Status</b>        |                   |                   |                   |                   |
| <b>Course</b>                      | <b>Hazard</b>     |                   | <b>Survival</b>   |                   |
|                                    | <b>High-SES</b>   | <b>Low-SES</b>    | <b>High-SES</b>   | <b>Low-SES</b>    |
| GenChem-1                          | .10, [.09, .11]   | .23, [.20, .25]   | .90, [.89, .91]   | .77, [.75, .80]   |
| GenChem-2                          | .07, [.06, .09]   | .12, [.09, .15]   | .83, [.82, .84]   | .65, [.64, .68]   |
| GenChem-3                          | .05, [.04, .06]   | .10, [.07, .12]   | .79, [.78, .80]   | .56, [.54, .59]   |
| OChem-1                            | .09, [.07, .10]   | .12, [.09, .16]   | .72, [.72, .74]   | .44, [.43, .47]   |
| OChem-2                            | .06, [.05, .07]   | .08, [.06, .12]   | .68, [.67, .70]   | .35, [.35, .38]   |
| OChem-3                            | .07, [.06, .09]   | .07, [.05, .11]   | .63, [.63, .65]   | .28, [.28, .30]   |
| <b>Family Education Background</b> |                   |                   |                   |                   |
| <b>Course</b>                      | <b>Hazard</b>     |                   | <b>Survival</b>   |                   |
|                                    | <b>Cont.-Gen.</b> | <b>First-Gen.</b> | <b>Cont.-Gen.</b> | <b>First-Gen.</b> |
| GenChem-1                          | .09, [.08, .10]   | .18, [.16, .20]   | .91, [.90, .92]   | .82, [.80, .84]   |
| GenChem-2                          | .07, [.06, .08]   | .10, [.08, .13]   | .84, [.83, .86]   | .71, [.70, .74]   |
| GenChem-3                          | .05, [.04, .06]   | .08, [.06, .10]   | .80, [.79, .81]   | .64, [.63, .67]   |
| OChem-1                            | .08, [.06, .10]   | .12, [.09, .15]   | .74, [.73, .75]   | .52, [.51, .55]   |
| OChem-2                            | .06, [.04, .07]   | .08, [.06, .11]   | .70, [.69, .71]   | .44, [.44, .47]   |
| OChem-3                            | .07, [.05, .09]   | .08, [.06, .12]   | .65, [.65, .67]   | .36, [.35, .38]   |

B. Fitted hazard and survival probability estimates, adjusted for indices of academic preparation and ability.

| <b>C. Binary Gender</b>            |                   |                   |                   |                   |
|------------------------------------|-------------------|-------------------|-------------------|-------------------|
| <b>Course</b>                      | <b>Hazard</b>     |                   | <b>Survival</b>   |                   |
|                                    | <b>Men</b>        | <b>Women</b>      | <b>Men</b>        | <b>Women</b>      |
| GenChem-1                          | .07, [.06, .08]   | .10, [.08, .11]   | .93, [.92, .94]   | .90, [.89, .92]   |
| GenChem-2                          | .07, [.06, .09]   | .06, [.04, .07]   | .86, [.86, .87]   | .85, [.84, .86]   |
| GenChem-3                          | .05, [.04, .06]   | .05, [.04, .07]   | .82, [.82, .84]   | .80, [.78, .81]   |
| OChem-1                            | .07, [.05, .09]   | .10, [.08, .14]   | .77, [.76, .78]   | .69, [.68, .72]   |
| OChem-2                            | .06, [.05, .08]   | .07, [.05, .10]   | .72, [.72, .74]   | .62, [.62, .65]   |
| OChem-3                            | .07, [.05, .09]   | .09, [.06, .13]   | .67, [.67, .69]   | .53, [.53, .56]   |
| <b>URM Status</b>                  |                   |                   |                   |                   |
| <b>Course</b>                      | <b>Hazard</b>     |                   | <b>Survival</b>   |                   |
|                                    | <b>Non-URM</b>    | <b>URM</b>        | <b>Non-URM</b>    | <b>URM</b>        |
| GenChem-1                          | .08, [.07, .09]   | .12, [.10, .14]   | .92, [.91, .93]   | .88, [.86, .90]   |
| GenChem-2                          | .06, [.05, .07]   | .08, [.06, .10]   | .86, [.85, .87]   | .80, [.79, .83]   |
| GenChem-3                          | .05, [.04, .06]   | .07, [.05, .10]   | .82, [.81, .83]   | .73, [.72, .76]   |
| OChem-1                            | .09, [.07, .11]   | .08, [.06, .12]   | .75, [.75, .77]   | .65, [.64, .68]   |
| OChem-2                            | .06, [.05, .08]   | .06, [.04, .10]   | .70, [.70, .72]   | .59, [.58, .61]   |
| OChem-3                            | .08, [.06, .10]   | .06, [.04, .10]   | .64, [.64, .66]   | .53, [.52, .55]   |
| <b>Socioeconomic Status</b>        |                   |                   |                   |                   |
| <b>Course</b>                      | <b>Hazard</b>     |                   | <b>Survival</b>   |                   |
|                                    | <b>High-SES</b>   | <b>Low-SES</b>    | <b>High-SES</b>   | <b>Low-SES</b>    |
| GenChem-1                          | .08, [.07, .09]   | .10, [.09, .12]   | .92, [.91, .93]   | .90, [.88, .91]   |
| GenChem-2                          | .06, [.05, .08]   | .06, [.05, .08]   | .86, [.85, .87]   | .83, [.82, .85]   |
| GenChem-3                          | .05, [.04, .06]   | .06, [.04, .08]   | .82, [.81, .83]   | .78, [.77, .80]   |
| OChem-1                            | .09, [.07, .11]   | .08, [.06, .11]   | .75, [.74, .76]   | .70, [.69, .72]   |
| OChem-2                            | .07, [.05, .08]   | .06, [.04, .09]   | .70, [.69, .71]   | .63, [.63, .66]   |
| OChem-3                            | .09, [.07, .11]   | .06, [.04, .09]   | .64, [.64, .66]   | .57, [.57, .60]   |
| <b>Family Education Background</b> |                   |                   |                   |                   |
| <b>Course</b>                      | <b>Hazard</b>     |                   | <b>Survival</b>   |                   |
|                                    | <b>Cont.-Gen.</b> | <b>First-Gen.</b> | <b>Cont.-Gen.</b> | <b>First-Gen.</b> |
| GenChem-1                          | .07, [.06, .08]   | .11, [.09, .12]   | .93, [.92, .94]   | .89, [.88, .91]   |
| GenChem-2                          | .06, [.05, .07]   | .07, [.05, .09]   | .87, [.86, .88]   | .83, [.81, .84]   |
| GenChem-3                          | .05, [.04, .06]   | .05, [.04, .07]   | .83, [.82, .84]   | .77, [.76, .79]   |
| OChem-1                            | .08, [.07, .10]   | .10, [.07, .13]   | .76, [.76, .78]   | .67, [.66, .69]   |
| OChem-2                            | .06, [.05, .08]   | .07, [.05, .10]   | .71, [.71, .73]   | .60, [.59, .62]   |
| OChem-3                            | .08, [.06, .10]   | .08, [.06, .11]   | .66, [.65, .68]   | .52, [.52, .54]   |

D. Coefficients for risk and attrition models, without controls for academic preparation and ability. SoI stands for Students of Interest.

| Comparison            | Variable         | Estimate | S.E.  | z-value | p-value |
|-----------------------|------------------|----------|-------|---------|---------|
| Binary Gender         | Intercept        | -2.575   | 0.071 | -36.340 | 0.000   |
|                       | GenChem-2        | 0.009    | 0.086 | 0.103   | 0.918   |
|                       | GenChem-3        | -0.478   | 0.105 | -4.537  | 0.000   |
|                       | OChem-1          | -0.061   | 0.116 | -0.532  | 0.595   |
|                       | OChem-2          | -0.188   | 0.128 | -1.463  | 0.144   |
|                       | OChem-3          | -0.003   | 0.133 | -0.019  | 0.985   |
|                       | Gender           | 0.328    | 0.047 | 7.035   | 0.000   |
|                       | Gender*GenChem-2 | -0.592   | 0.077 | -7.696  | 0.000   |
|                       | Gender*GenChem-3 | -0.178   | 0.101 | -1.770  | 0.077   |
|                       | Gender*OChem-1   | 0.159    | 0.103 | 1.538   | 0.124   |
|                       | Gender*OChem-2   | -0.137   | 0.123 | -1.120  | 0.263   |
|                       | Gender*OChem-3   | -0.085   | 0.128 | -0.666  | 0.505   |
|                       | SAT              | -0.629   | 0.022 | -28.232 | 0.000   |
|                       | HSGPA            | -0.491   | 0.019 | -25.813 | 0.000   |
| URM Status            | Intercept        | -2.434   | 0.066 | -37.084 | 0.000   |
|                       | GenChem-2        | -0.287   | 0.078 | -3.691  | 0.000   |
|                       | GenChem-3        | -0.568   | 0.089 | -6.380  | 0.000   |
|                       | OChem-1          | 0.089    | 0.098 | 0.908   | 0.364   |
|                       | OChem-2          | -0.238   | 0.110 | -2.162  | 0.031   |
|                       | OChem-3          | 0.018    | 0.113 | 0.157   | 0.875   |
|                       | URM              | 0.415    | 0.064 | 6.517   | 0.000   |
|                       | URM*GenChem-2    | -0.155   | 0.108 | -1.438  | 0.151   |
|                       | URM*GenChem-3    | 0.006    | 0.140 | 0.044   | 0.965   |
|                       | URM*OChem-1      | -0.464   | 0.164 | -2.829  | 0.005   |
|                       | URM*OChem-2      | -0.415   | 0.200 | -2.077  | 0.038   |
|                       | URM*OChem-3      | -0.761   | 0.230 | -3.314  | 0.001   |
|                       | SAT              | -0.619   | 0.022 | -27.504 | 0.000   |
|                       | HSGPA            | -0.460   | 0.019 | -24.562 | 0.000   |
| Socio-economic Status | Intercept        | -2.439   | 0.065 | -37.583 | 0.000   |
|                       | GenChem-2        | -0.229   | 0.079 | -2.894  | 0.004   |
|                       | GenChem-3        | -0.559   | 0.091 | -6.144  | 0.000   |
|                       | OChem-1          | 0.121    | 0.099 | 1.222   | 0.222   |
|                       | OChem-2          | -0.193   | 0.111 | -1.730  | 0.084   |
|                       | OChem-3          | 0.085    | 0.113 | 0.752   | 0.452   |
|                       | SES              | 0.276    | 0.053 | 5.229   | 0.000   |
|                       | SES*GenChem-2    | -0.317   | 0.088 | -3.624  | 0.000   |
|                       | SES*GenChem-3    | -0.101   | 0.110 | -0.916  | 0.360   |
|                       | SES*OChem-1      | -0.358   | 0.117 | -3.049  | 0.002   |

|                                   |               |        |       |         |       |
|-----------------------------------|---------------|--------|-------|---------|-------|
|                                   | SES*OChem-2   | -0.363 | 0.144 | -2.524  | 0.012 |
|                                   | SES*OChem-3   | -0.698 | 0.160 | -4.371  | 0.000 |
|                                   | SAT           | -0.617 | 0.023 | -27.077 | 0.000 |
|                                   | HSGPA         | -0.461 | 0.018 | -25.088 | 0.000 |
| Family<br>Education<br>Background | Intercept     | -2.553 | 0.069 | -37.128 | 0.000 |
|                                   | GenChem-2     | -0.187 | 0.084 | -2.241  | 0.025 |
|                                   | GenChem-3     | -0.446 | 0.097 | -4.616  | 0.000 |
|                                   | OChem-1       | 0.140  | 0.105 | 1.332   | 0.183 |
|                                   | OChem-2       | -0.150 | 0.118 | -1.264  | 0.206 |
|                                   | OChem-3       | 0.124  | 0.120 | 1.026   | 0.305 |
|                                   | FGN           | 0.410  | 0.047 | 8.725   | 0.000 |
|                                   | FGN*GenChem-2 | -0.266 | 0.077 | -3.438  | 0.001 |
|                                   | FGN*GenChem-3 | -0.258 | 0.100 | -2.592  | 0.010 |
|                                   | FGN*OChem-1   | -0.197 | 0.101 | -1.953  | 0.051 |
|                                   | FGN*OChem-2   | -0.287 | 0.124 | -2.308  | 0.021 |
|                                   | FGN*OChem-3   | -0.422 | 0.130 | -3.240  | 0.001 |
|                                   | SAT           | -0.590 | 0.022 | -26.218 | 0.000 |
|                                   | HSGPA         | -0.475 | 0.019 | -25.318 | 0.000 |

E. Coefficients for risk and attrition models, with controls for academic preparation and ability.

| Variable                                      | Estimate | S.E.  | z-value | p-value |
|-----------------------------------------------|----------|-------|---------|---------|
| <b>Binary Gender Comparison</b>               |          |       |         |         |
| (Intercept)                                   | -2.806   | 0.080 | -35.020 | 0.000   |
| GC2                                           | -0.034   | 0.081 | -0.414  | 0.679   |
| GC3                                           | -0.306   | 0.103 | -2.975  | 0.003   |
| OC1                                           | 0.157    | 0.114 | 1.376   | 0.169   |
| OC2                                           | -0.012   | 0.130 | -0.093  | 0.926   |
| OC3                                           | 0.130    | 0.139 | 0.936   | 0.349   |
| Gender                                        | 0.395    | 0.046 | 8.601   | 0.000   |
| GC2 x Gender                                  | -0.504   | 0.075 | -6.722  | 0.000   |
| GC3 x Gender                                  | -0.240   | 0.099 | -2.422  | 0.015   |
| OC1 x Gender                                  | 0.076    | 0.103 | 0.732   | 0.464   |
| OC2 x Gender                                  | -0.189   | 0.124 | -1.518  | 0.129   |
| OC3 x Gender                                  | -0.100   | 0.132 | -0.754  | 0.451   |
| SAT                                           | -0.433   | 0.016 | -26.594 | 0.000   |
| HSGPA                                         | -2.361   | 0.096 | -24.696 | 0.000   |
| <b>URM Comparison</b>                         |          |       |         |         |
| (Intercept)                                   | -2.640   | 0.074 | -35.722 | 0.000   |
| GC2                                           | -0.266   | 0.073 | -3.635  | 0.000   |
| GC3                                           | -0.424   | 0.087 | -4.903  | 0.000   |
| OC1                                           | 0.280    | 0.096 | 2.900   | 0.004   |
| OC2                                           | -0.055   | 0.111 | -0.494  | 0.621   |
| OC3                                           | 0.163    | 0.116 | 1.400   | 0.161   |
| URM                                           | 0.390    | 0.062 | 6.245   | 0.000   |
| GC2 x URM                                     | -0.164   | 0.105 | -1.570  | 0.116   |
| GC3 x URM                                     | -0.001   | 0.138 | -0.004  | 0.996   |
| OC1 x URM                                     | -0.421   | 0.161 | -2.620  | 0.009   |
| OC2 x URM                                     | -0.434   | 0.200 | -2.171  | 0.030   |
| OC3 x URM                                     | -0.721   | 0.231 | -3.125  | 0.002   |
| SAT                                           | -0.432   | 0.016 | -26.615 | 0.000   |
| HSGPA                                         | -2.216   | 0.092 | -24.062 | 0.000   |
| <b>Socioeconomic Comparison</b>               |          |       |         |         |
| (Intercept)                                   | -2.631   | 0.072 | -36.716 | 0.000   |
| GC2                                           | -0.217   | 0.075 | -2.889  | 0.004   |
| GC3                                           | -0.411   | 0.089 | -4.625  | 0.000   |
| OC1                                           | 0.284    | 0.098 | 2.912   | 0.004   |
| OC2                                           | -0.043   | 0.112 | -0.386  | 0.700   |
| OC3                                           | 0.219    | 0.117 | 1.875   | 0.061   |
| SES                                           | 0.252    | 0.052 | 4.806   | 0.000   |
| GC2 x SES                                     | -0.312   | 0.086 | -3.622  | 0.000   |
| GC3 x SES                                     | -0.117   | 0.110 | -1.071  | 0.284   |
| OC1 x SES                                     | -0.309   | 0.117 | -2.632  | 0.008   |
| OC2 x SES                                     | -0.363   | 0.146 | -2.483  | 0.013   |
| OC3 x SES                                     | -0.721   | 0.165 | -4.378  | 0.000   |
| SAT                                           | -0.431   | 0.016 | -26.609 | 0.000   |
| HSGPA                                         | -2.207   | 0.090 | -24.554 | 0.000   |
| <b>Family Education Background Comparison</b> |          |       |         |         |
| (Intercept)                                   | -2.773   | 0.076 | -36.264 | 0.000   |
| GC2                                           | -0.170   | 0.079 | -2.144  | 0.032   |
| GC3                                           | -0.283   | 0.094 | -3.008  | 0.003   |
| OC1                                           | 0.322    | 0.103 | 3.116   | 0.002   |
| OC2                                           | 0.036    | 0.119 | 0.299   | 0.765   |
| OC3                                           | 0.271    | 0.124 | 2.176   | 0.030   |

|           |        |       |         |       |
|-----------|--------|-------|---------|-------|
| FGN       | 0.433  | 0.046 | 9.357   | 0.000 |
| GC2 x FGN | -0.254 | 0.075 | -3.387  | 0.001 |
| GC3 x FGN | -0.313 | 0.098 | -3.174  | 0.002 |
| OC1 x FGN | -0.211 | 0.101 | -2.094  | 0.036 |
| OC2 x FGN | -0.331 | 0.125 | -2.647  | 0.008 |
| OC3 x FGN | -0.441 | 0.133 | -3.305  | 0.001 |
| SAT       | -0.411 | 0.016 | -25.699 | 0.000 |
| HSGPA     | -2.255 | 0.092 | -24.569 | 0.000 |

### ***Consequences of achievement gaps: “Next steps” after GenChem 1***

Fig. S3 plots data on what students did after taking the initial course in general chemistry as a function of their grade in that course, without controlling for indices of academic preparation. A dashed line represents the underrepresented group identified on the right margin; a solid line represents the relevant comparison group (e.g. men in the top panel). “Drop” (in red) represents the probability that the student never reappeared in the dataset; “retake” (blue) indicates the probability that the student took the initial course in the series again; “persist” is the probability that the student took the second course in the series at some point during the study period. The vertical dashed line on the graph indicates the 1.7 grade threshold for moving on in the series; the vertical dotted line on the graph indicates the typical median grade of 2.6 in each section. The data in this figure are analogous to the analysis presented in Fig. 4, but the estimated probabilities in this figure are not controlled for indices of student academic preparation and ability.

Table S5 presents the coefficients from the models on the next steps taken by students after enrolling in GenChem 1. Part A reports the values from models that do not control for indices of student academic preparation and ability; part B reports the values from models that do control for indices of student academic preparation and ability.

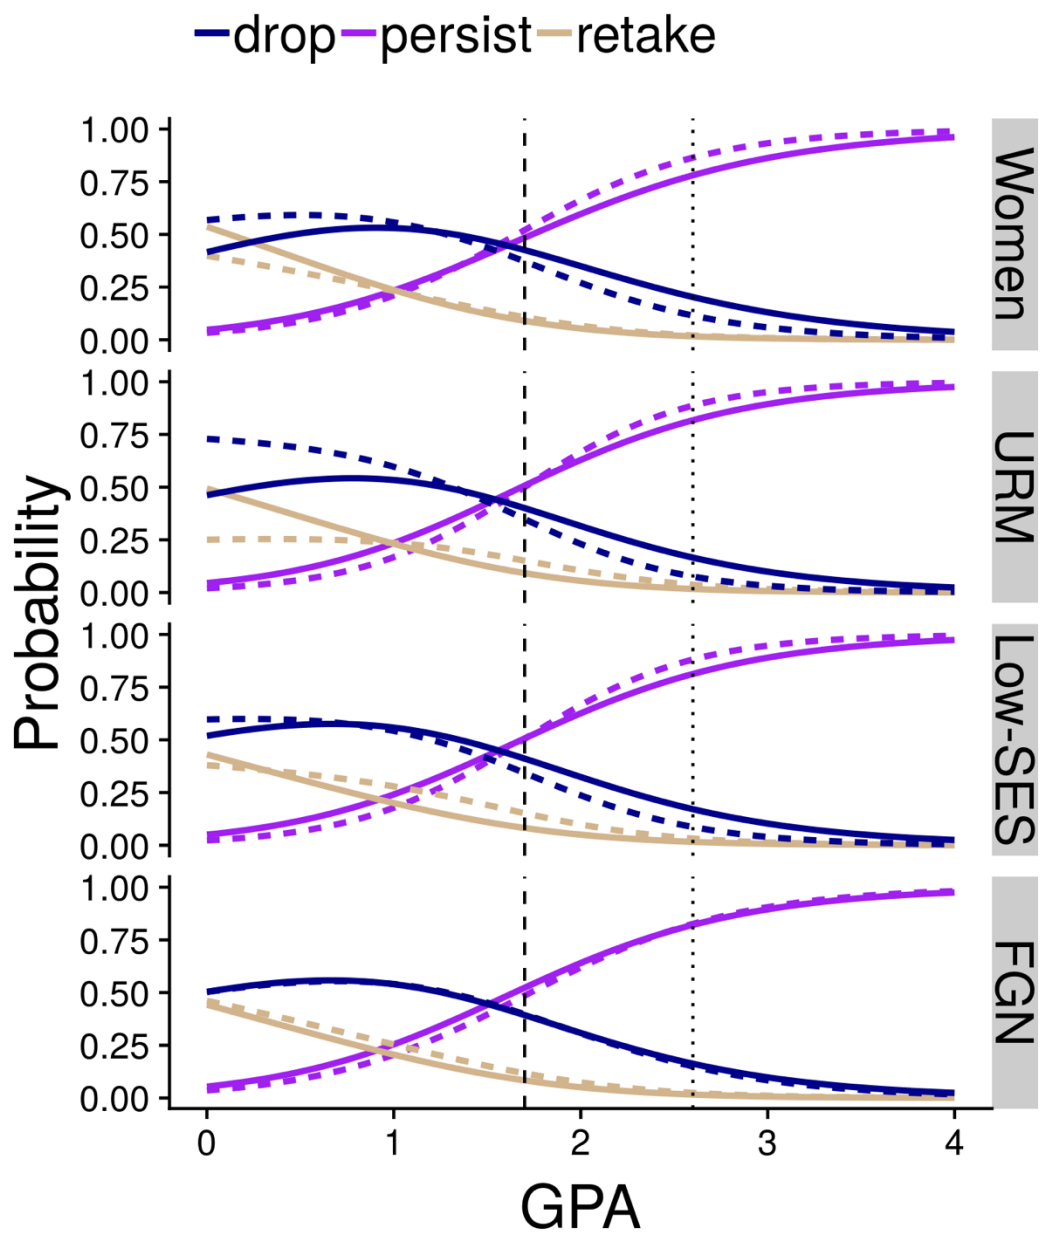

**Fig. S3. Consequences of GenChem 1 grades for four student subgroups, not controlled for indices of academic preparation.**

**Table S5. Model coefficients for “next-steps” analyses.**

A. Coefficients and standard errors for “Drop” and “Persist” outcomes relative to “Retake” without adjusting for student academic preparation (see Fig. 4).

| Variable                 | Drop     |       | Persist  |       |
|--------------------------|----------|-------|----------|-------|
|                          | Estimate | S.E.  | Estimate | S.E.  |
| <b>Gender Comparison</b> |          |       |          |       |
| Intercept                | 0.77     | 0.023 | -2.06    | 0.060 |
| Gender                   | 0.45     | 0.035 | 0.57     | 0.08  |
| Grade                    | 0.62     | 0.025 | -0.48    | 0.043 |
| Gender*Grade             | 0.23     | 0.036 | 0.25     | 0.058 |
| <b>URM Comparison</b>    |          |       |          |       |
| Intercept                | 0.95     | 0.018 | -1.90    | 0.043 |
| URM                      | 0.51     | 0.072 | 1.13     | 0.116 |
| Grade                    | 0.69     | 0.019 | -0.41    | 0.032 |
| URM*Grade                | 0.37     | 0.064 | 0.47     | 0.079 |
| <b>SES Comparison</b>    |          |       |          |       |
| Intercept                | 0.92     | 0.018 | -2.01    | 0.047 |
| SES                      | 0.48     | 0.052 | 1.1      | 0.092 |
| Grade                    | 0.68     | 0.02  | -0.38    | 0.036 |
| SES*Grade                | 0.30     | 0.049 | 0.29     | 0.064 |
| <b>FGN Comparison</b>    |          |       |          |       |
| Intercept                | 0.99     | 0.021 | -1.95    | 0.05  |
| FGN                      | 0.01     | 0.036 | 0.41     | 0.08  |
| Grade                    | 0.67     | 0.024 | -0.38    | 0.044 |
| FGN*Grade                | 0.09     | 0.037 | 0.08     | 0.059 |

\*  $p < .05$ ; \*\*  $p < .01$ ; \*\*\*  $p < .001$



B. Coefficients and standard errors for “Drop” and “Persist” outcomes relative to “Retake” with controls for student academic preparation and ability (see fig. S3).

| Variable                 | Drop     |       | Persist  |       |
|--------------------------|----------|-------|----------|-------|
|                          | Estimate | S.E.  | Estimate | S.E.  |
| <b>Gender Comparison</b> |          |       |          |       |
| Intercept                | 0.79     | 0.024 | -2.16    | 0.063 |
| Gender                   | 0.43     | 0.036 | 0.56     | 0.083 |
| Grade                    | 0.66     | 0.027 | -0.29    | 0.046 |
| Gender*Grade             | 0.24     | 0.036 | 0.32     | 0.06  |
| SAT                      | 0.00     | 0.0   | 0.00     | 0.0   |
| HSGPA                    | -0.02    | 0.018 | -0.26    | 0.03  |
| <b>URM Comparison</b>    |          |       |          |       |
| Intercept                | 0.95     | 0.018 | -1.96    | 0.045 |
| URM                      | 0.44     | 0.07  | 0.81     | 0.12  |
| Grade                    | 0.73     | 0.021 | -0.22    | 0.036 |
| URM*Grade                | 0.37     | 0.06  | 0.37     | 0.08  |
| SAT                      | 0.00     | 0.0   | 0.00     | 0.0   |
| HSGPA                    | 0.02     | 0.017 | -0.21    | 0.03  |
| <b>SES Comparison</b>    |          |       |          |       |
| Intercept                | 0.94     | 0.019 | -2.01    | 0.048 |
| SES                      | 0.40     | 0.054 | 0.72     | 0.098 |
| Grade                    | 0.71     | 0.022 | -0.23    | 0.039 |
| SES*Grade                | 0.29     | 0.049 | 0.35     | 0.067 |
| SAT                      | 0.00     | 0.0   | 0.00     | 0.0   |
| HSGPA                    | 0.02     | 0.018 | -0.21    | 0.03  |
| <b>FGN Comparison</b>    |          |       |          |       |
| Intercept                | 1.03     | 0.022 | -1.93    | 0.055 |
| FGN                      | -0.08    | 0.037 | 0.13     | 0.084 |
| Grade                    | 0.72     | 0.026 | -0.20    | 0.047 |
| FGN*Grade                | 0.09     | 0.037 | 0.11     | 0.062 |
| SAT                      | 0.00     | 0.0   | 0.00     | 0.0   |
| HSGPA                    | 0.02     | 0.017 | -0.22    | 0.030 |

***Model selection for grade gap, hazard/attrition, and “next steps” analyses***

Table S6 reports the full models, assessed models, and regression statistics used in model selection for analyzing A) achievement gaps, B) risk of not advancing, and C) what students did after the first time they took GenChem 1—their “next step” in terms of continuing in STEM majors that require the full general chemistry sequence, where “status” refers to whether the student re-took the course, never again appeared in the dataset (“dropped”), or went on to the next course in the series during the study period (“persisted”). In this table, “Step” refers to the sequence in stepwise selection. In the “Model” column, variables that follow the form “Women \*

course” specify a two-way interaction term; variables that follow the form (1|StudentNo) indicate a random effect, with all other terms being fixed effects. “AICc” is the value of the Akaike Information Criterion with the small-sample size correction; “delta” indicates the magnitude of the difference between the model in the row and the model with the smallest AICc. “Weight” is the model weighting.

To analyze the risk of not advancing for each student subgroup in each course in the GenChem and OChem series, and attrition over time, we conducted a two-phase model selection procedure. First we selected the optimal random-effect structure in the presence of all fixed effects based on AIC. Then, with the optimal random-effect structure, fixed effects were retained based on AIC. We repeated this analysis with a second model adjusted for academic preparation and ability. Hazard probability estimates ( $\widehat{h}_j(t_i)$ ) and standard errors for each group,  $j$ , and at each time point,  $i$ , were estimated by applying an inverse transformation to the logit-hazard model:

$$\widehat{h}_j(t_i) = \frac{1}{1 + e^{-\text{logit}_{ij}}}$$

Survival probabilities,  $\widehat{S}_i(t_i)$ , were then estimated as:

$$\widehat{S}_i(t_i) = \widehat{S}_i(t_{i-1})[1 - \widehat{h}_i(t_i)]$$

**Table S6. Model selection and regression statistics**

A. Gap models.

| Full model                                                                                                      | Step | Model                                                                                        | AICc     | delta   | df | logLik    | weight    |
|-----------------------------------------------------------------------------------------------------------------|------|----------------------------------------------------------------------------------------------|----------|---------|----|-----------|-----------|
| <i>grade ~ Women + course + Women * course + (1   StudentNo) + (1   quarter) + (1   section) + (1   year)</i>   | 1    | <i>grade ~ Women + course + Women * course + (1   StudentNo) + (1   section)</i>             | 172119.1 | 0       | 15 | -86044.6  | 1         |
|                                                                                                                 | 1    | <i>grade ~ Women + course + Women * course + (1   StudentNo)</i>                             | 173101.6 | 982.4   | 14 | -86536.8  | 4.62E-214 |
|                                                                                                                 | 1    | <i>grade ~ Women + course + Women * course + (1   section)</i>                               | 203087.3 | 30968.2 | 14 | -101529.6 | 0         |
|                                                                                                                 | 2    | <i>grade ~ Women + course + Women * course + (1   StudentNo) + (1   section)</i>             | 172040.9 | 0       | 15 | -86005.5  | 1         |
|                                                                                                                 | 2    | <i>grade ~ Women + course + Women * course</i>                                               | 203003.3 | 30962.0 | 13 | -101488.6 | 0         |
|                                                                                                                 | 3    | <i>grade ~ Women + course + Women * course + (1   StudentNo) + (1   section)</i>             | 172040.9 | 0       | 15 | -86005.5  | 1         |
|                                                                                                                 | 3    | <i>grade ~ Women + course + (1   StudentNo) + (1   section)</i>                              | 172270.7 | 229.7   | 10 | -86125.3  | 1.29E-50  |
| <i>grade ~ URM + course + URM * course + (1   StudentNo) + (1   year) + (1   quarter) + (1   section)</i>       | 1    | <i>grade ~ URM + course + URM * course + (1   StudentNo) + (1   section)</i>                 | 171463.6 | 0       | 15 | -85716.8  | 1         |
|                                                                                                                 | 1    | <i>grade ~ URM + course + URM * course + (1   StudentNo)</i>                                 | 172493.7 | 1030.1  | 14 | -86232.9  | 2.10E-224 |
|                                                                                                                 | 1    | <i>grade ~ URM + course + URM * course + (1   section)</i>                                   | 201984.6 | 30520.9 | 14 | -100978.3 | 0         |
|                                                                                                                 | 2    | <i>grade ~ URM + course + URM * course + (1   StudentNo) + (1   quarter) + (1   section)</i> | 165903.8 | 0       | 15 | -82936.9  | 1         |
|                                                                                                                 | 2    | <i>grade ~ URM + course + URM * course</i>                                                   | 195914.9 | 30011.1 | 13 | -97944.4  | 0         |
|                                                                                                                 | 3    | <i>grade ~ URM + course + URM * course + (1   StudentNo) (1   section)</i>                   | 165905.8 | 0       | 15 | -82936.9  | 1         |
|                                                                                                                 | 3    | <i>grade ~ URM + course + (1   StudentNo) + (1   section)</i>                                | 165965.7 | 59.9    | 10 | -82971.9  | 9.79E-14  |
| <i>grade ~ LowSES + course + LowSES * course + (1   StudentNo) + (1   year) + (1   quarter) + (1   section)</i> | 1    | <i>grade ~ LowSES + course + LowSES * course + (1   StudentNo) + (1   section)</i>           | 171463.6 | 0       | 15 | -85716.8  | 1         |
|                                                                                                                 | 1    | <i>grade ~ LowSES + course + LowSES * course + (1   StudentNo)</i>                           | 172493.7 | 1030.1  | 14 | -86232.9  | 2.10E-224 |
|                                                                                                                 | 1    | <i>grade ~ LowSES + course + LowSES * course + (1   section)</i>                             | 201984.6 | 30520.9 | 14 | -100978.3 | 0         |
|                                                                                                                 | 2    | <i>grade ~ URM + course + LowSES * course + (1   StudentNo) + (1   section)</i>              | 171388.4 | 0       | 15 | -85679.2  | 1         |
|                                                                                                                 | 2    | <i>grade ~ URM + course + LowSES * course</i>                                                | 201903.1 | 30514.7 | 13 | -100938.6 | 0         |

|                                                                                                                      |   |                                                                                         |          |         |    |           |                 |
|----------------------------------------------------------------------------------------------------------------------|---|-----------------------------------------------------------------------------------------|----------|---------|----|-----------|-----------------|
|                                                                                                                      | 3 | grade ~ LowSES + course + LowSES * course + (1   StudentNo) + (1   section)             | 171388.4 | 0       | 15 | -85679.2  | 1               |
| grade ~ FGN + course + FGN * course + (1   StudentNo) + (1   year) + (1   quarter) + (1   section)                   | 1 | grade ~ FGN + course + FGN * course + (1   StudentNo) + (1   section)                   | 168574.9 | 0       | 15 | -84272.5  | 1               |
|                                                                                                                      | 1 | grade ~ FGN + course + FGN * course + (1   StudentNo)                                   | 169552.4 | 977.5   | 14 | -84762.2  | 5.50E-213       |
|                                                                                                                      | 1 | grade ~ FGN + course + FGN * course + (1   section)                                     | 198253.7 | 29678.8 | 14 | -99112.9  | 0               |
|                                                                                                                      | 2 | grade ~ URM + course + FGN * course + (1   StudentNo) + (1   section)                   | 168497.3 | 0       | 15 | -84233.6  | 1               |
|                                                                                                                      | 2 | grade ~ URM + course + FGN * course                                                     | 198170.1 | 29672.8 | 13 | -99072.0  | 0               |
|                                                                                                                      | 3 | grade ~ FGN + course + FGN * course + (1   StudentNo) + (1   section)                   | 168497.3 | 0       | 15 | -84233.6  | 0.9999990<br>33 |
|                                                                                                                      | 3 | grade ~ FGN + course + (1   StudentNo) + (1   section)                                  | 168525.0 | 27.7    | 10 | -84252.5  | 9.67E-07        |
| grade ~ Women + course + Women * course + SAT + HSGPA + (1   StudentNo) + (1   quarter) + (1   section) + (1   year) | 1 | grade ~ Women + course + Women * course + SAT + HSGPA + (1   StudentNo) + (1   section) | 164425.9 | 0       | 17 | -82196.0  | 1               |
|                                                                                                                      | 1 | grade ~ Women + course + Women * course + SAT + HSGPA + (1   StudentNo)                 | 165762.0 | 1336.1  | 16 | -82865.0  | 7.40E-291       |
|                                                                                                                      | 1 | grade ~ Women + course + Women * course + SAT + HSGPA + (1   section)                   | 188467.8 | 24041.9 | 16 | -94218.0  | 0               |
|                                                                                                                      | 2 | grade ~ Women + course + Women * course + SAT + HSGPA + (1   StudentNo) + (1   section) | 164321.1 | 0       | 17 | -82143.5  | 1               |
|                                                                                                                      | 2 | grade ~ Women + course + Women * course + SAT + HSGPA                                   | 188505.0 | 24183.9 | 15 | -94237.45 | 0               |
|                                                                                                                      | 3 | grade ~ Women + course + Women * course + SAT + HSGPA + (1   StudentNo) + (1   section) | 164321.1 | 0       | 17 | -82143.5  | 1               |
|                                                                                                                      | 3 | grade ~ Women + course + SAT + HSGPA + (1   StudentNo) + (1   section)                  | 164547.4 | 226.3   | 12 | -82261.7  | 7.08E-50        |
| grade ~ URM + course + URM * course + SAT + HSGPA + (1   StudentNo) + (1   quarter) + (1   section) + (1   year)     | 1 | grade ~ URM + course + URM * course + SAT + HSGPA + (1   StudentNo) + (1   section)     | 159035.2 | 0       | 17 | -79500.6  | 1               |
|                                                                                                                      | 1 | grade ~ URM + course + URM * course + SAT + HSGPA + (1   StudentNo)                     | 160356.4 | 1321.3  | 16 | -80162.2  | 1.23E-287       |
|                                                                                                                      | 1 | grade ~ URM + course + URM * course + SAT + HSGPA + (1   section)                       | 182542.5 | 23507.4 | 16 | -91255.3  | 0               |
|                                                                                                                      | 2 | grade ~ URM + course + URM * course + SAT + HSGPA + (1   StudentNo) + (1   section)     | 158937.3 | 0       | 17 | -79451.6  | 1               |
|                                                                                                                      | 2 | grade ~ URM + course + URM * course + SAT + HSGPA                                       | 182597.1 | 23659.8 | 15 | -91283.5  | 0               |

|                                                                                                                        |   |                                                                                           |          |         |    |           |             |
|------------------------------------------------------------------------------------------------------------------------|---|-------------------------------------------------------------------------------------------|----------|---------|----|-----------|-------------|
|                                                                                                                        | 3 | grade ~ URM + course + URM * course + SAT + HSGPA + (1   StudentNo) + (1   section)       | 158937.3 | 0       | 17 | -79451.6  | 1           |
|                                                                                                                        | 3 | grade ~ URM + course + SAT + HSGPA + (1   StudentNo) + (1   section)                      | 158997.7 | 60.4    | 12 | -79486.8  | 7.63E-14    |
| grade ~ LowSES + course + LowSES * course + SAT + HSGPA + (1   StudentNo) + (1   quarter) + (1   section) + (1   year) | 1 | grade ~ LowSES + course + LowSES * course + SAT + HSGPA + (1   StudentNo) + (1   section) | 164695.8 | 0       | 17 | -82330.9  | 1           |
|                                                                                                                        | 1 | grade ~ LowSES + course + LowSES * course + SAT + HSGPA + (1   StudentNo)                 | 166032.3 | 1336.5  | 16 | -83000.1  | 6.04E-291   |
|                                                                                                                        | 1 | grade ~ LowSES + course + LowSES * course + SAT + HSGPA + (1   section)                   | 189032.0 | 24336.2 | 16 | -94500.01 | 0           |
|                                                                                                                        | 2 | grade ~ LowSES + course + LowSES * course + SAT + HSGPA + (1   StudentNo) + (1   section) | 164593.9 | 0       | 17 | -82279.9  | 1           |
|                                                                                                                        | 2 | grade ~ LowSES + course + LowSES * course + SAT + HSGPA                                   | 189074.4 | 24480.5 | 15 | -94522.2  | 0           |
|                                                                                                                        | 3 | grade ~ LowSES + course + LowSES * course + SAT + HSGPA + (1   StudentNo) + (1   section) | 164593.9 | 0       | 17 | -82279.9  | 1           |
| grade ~ FGN + course + FGN * course + SAT + HSGPA + (1   StudentNo) + (1   quarter) + (1   section) + (1   year)       | 1 | grade ~ FGN + course + FGN * course + SAT + HSGPA + (1   StudentNo) + (1   section)       | 161782.8 | 0       | 17 | -80874.4  | 1           |
|                                                                                                                        | 1 | grade ~ FGN + course + FGN * course + SAT + HSGPA + (1   StudentNo)                       | 163080.4 | 1297.5  | 16 | -81524.2  | 1.74E-282   |
|                                                                                                                        | 1 | grade ~ FGN + course + FGN * course + SAT + HSGPA + (1   section)                         | 185358.1 | 23575.3 | 16 | -92663.1  | 0           |
|                                                                                                                        | 2 | grade ~ FGN + course + FGN * course + SAT + HSGPA + (1   StudentNo) + (1   section)       | 161678.6 | 0       | 17 | -80822.3  | 1           |
|                                                                                                                        | 2 | grade ~ FGN + course + FGN * course + SAT + HSGPA                                         | 185402.3 | 23723.7 | 15 | -92686.2  | 0           |
|                                                                                                                        | 3 | grade ~ FGN + course + FGN * course + SAT + HSGPA + (1   StudentNo) + (1   section)       | 161678.6 | 0       | 17 | -80822.3  | 0.999999802 |
|                                                                                                                        | 3 | grade ~ FGN + course + SAT + HSGPA + (1   StudentNo) + (1   section)                      | 161709.5 | 30.9    | 12 | -80842.8  | 1.98E-07    |

## B. Discrete-Time Logit-Hazard Analysis

| Comparison                                              | Step | Model                                                                    | df        | logLik          | AIC            | delta      |
|---------------------------------------------------------|------|--------------------------------------------------------------------------|-----------|-----------------|----------------|------------|
| <b>RAW MODELS</b>                                       |      |                                                                          |           |                 |                |            |
| Binary Gender <sup>a</sup>                              | 1    | logit(h) ~ Course * Gender + (1 StudentID) + (1 SectionID)               | 14        | -20315.5        | 40659.0        | 0.0        |
|                                                         |      | logit(h) ~ Course * Gender + (1 StudentID) + (1 Year) + (1 SectionID)    | 15        | -20315.5        | 40661.0        | 1.9        |
|                                                         | 2    | logit(h) ~ Course * Gender + (1 StudentID) + (1 SectionID)               | 14        | -20315.5        | 40659.0        | 0.0        |
|                                                         |      | logit(h) ~ Course * Gender                                               | 12        | -20581.3        | 41186.6        | 527.5      |
|                                                         | 3    | <b>logit(h) ~ Course * Gender + (1 StudentID) + (1 SectionID)</b>        | <b>14</b> | <b>-20315.5</b> | <b>40659.0</b> | <b>0.0</b> |
|                                                         |      | logit(h) ~ Course + Gender + (1 StudentID) + (1 SectionID)               | 9         | -20355.5        | 40728.9        | 69.9       |
| URM Status <sup>b</sup>                                 | 1    | logit(h) ~ Course * URM + (1 StudentID) + (1 SectionID)                  | 14        | -19526.5        | 39081.1        | 0.0        |
|                                                         |      | logit(h) ~ Course * URM + (1 StudentID) + (1 Year) + (1 SectionID)       | 15        | -19526.0        | 39081.9        | 0.9        |
|                                                         | 2    | logit(h) ~ Course * URM + (1 StudentID) + (1 SectionID)                  | 14        | -19526.5        | 39081.1        | 0.0        |
|                                                         |      | logit(h) ~ Course * URM                                                  | 12        | -19779.5        | 39583.1        | 502.0      |
|                                                         | 3    | <b>logit(h) ~ Course * URM + (1 StudentID) + (1 SectionID)</b>           | <b>14</b> | <b>-19526.5</b> | <b>39081.1</b> | <b>0.0</b> |
|                                                         |      | logit(h) ~ Course + URM + (1 StudentID) + (1 SectionID)                  | 9         | -19549.6        | 39117.2        | 36.1       |
| Socio-economic Status <sup>c</sup>                      | 1    | logit(h) ~ Course * SES + (1 StudentID) + (1 SectionID)                  | 14        | -20108.9        | 40245.9        | 0.0        |
|                                                         |      | logit(h) ~ Course * SES + (1 StudentID) + (1 Year) + (1 SectionID)       | 15        | -20108.8        | 40247.7        | 1.8        |
|                                                         |      | logit(h) ~ Course * SES + (1 StudentID) + (1 Term) + (1 SectionID)       | 15        | -20109.2        | 40248.3        | 2.4        |
|                                                         | 2    | logit(h) ~ Course * SES + (1 StudentID) + (1 SectionID)                  | 14        | -19526.5        | 39081.1        | 0.0        |
|                                                         |      | logit(h) ~ Course * SES                                                  | 12        | -19779.5        | 39583.1        | 502.0      |
|                                                         | 3    | <b>logit(h) ~ Course * SES + (1 StudentID) + (1 SectionID)</b>           | <b>14</b> | <b>-20108.9</b> | <b>40245.9</b> | <b>0.0</b> |
| logit(h) ~ Course + SES + (1 StudentID) + (1 SectionID) |      | 9                                                                        | -20145.6  | 40309.2         | 63.3           |            |
| Family Education Background <sup>d</sup>                | 1    | logit(h) ~ Course * FGN + (1 StudentID) + (1 SectionID)                  | 14        | -19777.9        | 39583.8        | 0.0        |
|                                                         |      | logit(h) ~ Course * FGN + (1 StudentID) + (1 Term) + (1 SectionID)       | 15        | -19777.5        | 39585.0        | 1.2        |
|                                                         | 2    | logit(h) ~ Course * FGN + (1 StudentID) + (1 SectionID)                  | 14        | -19777.9        | 39583.8        | 0.0        |
|                                                         |      | logit(h) ~ Course * FGN                                                  | 15        | -19777.5        | 39585.0        | 1.2        |
|                                                         | 3    | <b>logit(h) ~ Course * FGN + (1 StudentID) + (1 SectionID)</b>           | <b>14</b> | <b>-19777.9</b> | <b>39583.8</b> | <b>0.0</b> |
|                                                         |      | logit(h) ~ Course + FGN + (1 StudentID) + (1 SectionID)                  | 9         | -19798.8        | 39615.7        | 31.9       |
| <b>ADJUSTED MODELS</b>                                  |      |                                                                          |           |                 |                |            |
| Binary Gender <sup>e</sup>                              | 1    | logit(h) ~ Course * Gender + SAT + HSGPA + (1 StudentID) + (1 SectionID) | 16        | -18960.1        | 37952.1        | NA         |

|                                          |   |                                                                                 |           |                 |                |            |
|------------------------------------------|---|---------------------------------------------------------------------------------|-----------|-----------------|----------------|------------|
|                                          | 2 | logit(h) ~ Course * Gender + SAT + HSGPA + (1 StudentID) + (1 SectionID)        | 16        | -18960.1        | 37952.1        | 0.0        |
|                                          |   | logit(h) ~ Course * Gender + SAT + HSGPA                                        | 14        | -19226.3        | 38480.5        | 569.4      |
|                                          | 3 | <b>logit(h) ~ Course * Gender + SAT + HSGPA + (1 StudentID) + (1 SectionID)</b> | <b>16</b> | <b>-18939.6</b> | <b>37911.2</b> | <b>0.0</b> |
|                                          |   | logit(h) ~ Course + Gender + SAT + HSGPA + (1 StudentID) + (1 SectionID)        | 11        | -18976.0        | 37974.1        | 62.9       |
| URM Status <sup>f</sup>                  | 1 | logit(h) ~ Course * URM + SAT + HSGPA + (1 StudentID) + (1 SectionID)           | 16        | -18347.4        | 36726.8        | NA         |
|                                          | 2 | logit(h) ~ Course * URM + SAT + HSGPA + (1 StudentID) + (1 SectionID)           | 16        | -18347.4        | 36726.8        | 0.0        |
|                                          |   | logit(h) ~ Course * URM + SAT + HSGPA                                           | 14        | -18620.5        | 37269.1        | 542.3      |
|                                          | 3 | <b>logit(h) ~ Course * URM + SAT + HSGPA + (1 StudentID) + (1 SectionID)</b>    | <b>16</b> | <b>-18347.4</b> | <b>36726.8</b> | <b>0.0</b> |
|                                          |   | logit(h) ~ Course + URM + SAT + HSGPA + (1 StudentID) + (1 SectionID)           | 11        | -18358.1        | 36738.2        | 11.4       |
| Socio-economic Status <sup>g</sup>       | 1 | logit(h) ~ Course * SES + SAT + HSGPA + (1 StudentID) + (1 SectionID)           | 16        | -18983.0        | 37998.0        | NA         |
|                                          | 2 | logit(h) ~ Course * SES + SAT + HSGPA + (1 StudentID) + (1 SectionID)           | 16        | -18983.0        | 37998.0        | 0.0        |
|                                          |   | logit(h) ~ Course * SES + SAT + HSGPA                                           | 12        | -20374.9        | 40773.7        | 2775.7     |
|                                          | 3 | <b>logit(h) ~ Course * SES + SAT + HSGPA + (1 StudentID) + (1 SectionID)</b>    | <b>16</b> | <b>-18983.0</b> | <b>37998.0</b> | <b>0.0</b> |
|                                          |   | logit(h) ~ Course + SES + SAT + HSGPA + (1 StudentID) + (1 SectionID)           | 11        | -18999.8        | 38021.6        | 23.5       |
| Family Education Background <sup>h</sup> | 1 | logit(h) ~ Course * FGN + SAT + HSGPA + (1 StudentID) + (1 SectionID)           | 16        | -18627.3        | 37286.5        | NA         |
|                                          | 2 | logit(h) ~ Course * FGN + SAT + HSGPA + (1 StudentID) + (1 SectionID)           | 16        | -18627.3        | 37286.5        | 0.0        |
|                                          |   | logit(h) ~ Course * FGN + SAT + HSGPA                                           | 12        | -20030.5        | 40085.0        | 2798.5     |
|                                          | 3 | <b>logit(h) ~ Course * FGN + SAT + HSGPA + (1 StudentID) + (1 SectionID)</b>    | <b>16</b> | <b>-18627.3</b> | <b>37286.5</b> | <b>0.0</b> |
|                                          |   | logit(h) ~ course + FGN + SAT + HSGPA + (1 StudentID) + (1 SectionID)           | 11        | -18638.3        | 37298.6        | 12.1       |

<sup>a</sup>Full model: logit(h) ~ Course\*Gender + (1|StudentID) + (1|Year) + (1|Term) + (1|SectionID)

<sup>b</sup>Full model: logit(h) ~ Course\*URM + (1|StudentID) + (1|Year) + (1|Term) + (1|SectionID)

<sup>c</sup>Full model: logit(h) ~ Course\*SES + (1|StudentID) + (1|Year) + (1|Term) + (1|SectionID)

<sup>d</sup>Full model: logit(h) ~ Course\*FGN + (1|StudentID) + (1|Year) + (1|Term) + (1|SectionID)

<sup>e</sup>Full model: logit(h) ~ Course\*Gender + SAT + HSGPA + (1|StudentID) + (1|SectionID); only model to converge

<sup>f</sup>Full model: logit(h) ~ Course\*URM + SAT + HSGPA + (1|StudentID) + (1|SectionID); only model to converge

<sup>g</sup>Full model: logit(h) ~ Course\*SES + SAT + HSGPA + (1|StudentID) + (1|SectionID); only model to converge

<sup>h</sup>Full model: logit(h) ~ Course\*FGN + SAT + HSGPA + (1|StudentID) + (1|SectionID); only model to converge

C. “Next steps after GenChem 1” plots.

| Full model                                           | Model                                                | weight | df | delta | AICc    | logLik   |
|------------------------------------------------------|------------------------------------------------------|--------|----|-------|---------|----------|
| status ~ URM + grade + URM:grade + SAT + HSGPA       | status ~ URM + grade + URM:grade + SAT + HSGPA       | 1.00   | 12 | 0.0   | 30649.0 | -15312.5 |
|                                                      | status ~ URM + grade + URM:grade + SAT               | 0.00   | 10 | 56.4  | 30705.5 | -15342.7 |
| status ~ Women + grade + Women:grade + SAT + HSGPA   | status ~ Women + grade + Women:grade + SAT + HSGPA   | 1.00   | 12 | 0.0   | 30536.7 | -15256.4 |
|                                                      | status ~ Women + grade + Women:grade + SAT           | 0.00   | 10 | 63.3  | 30600.0 | -15290.0 |
| status ~ FGN + grade + FGN:grade + SAT + HSGPA       | status ~ FGN + grade + FGN:grade + SAT + HSGPA       | 1.00   | 12 | 0.0   | 30702.8 | -15339.4 |
|                                                      | status ~ FGN + grade + FGN:grade + SAT               | 0.00   | 10 | 60.1  | 30762.9 | -15371.5 |
|                                                      | status ~ FGN + grade + SAT                           | 0.00   | 8  | 66.0  | 30768.8 | -15376.4 |
|                                                      | status ~ grade + SAT                                 | 0.00   | 6  | 74.7  | 30777.5 | -15382.8 |
| status ~ LowSES + grade + LowSES:grade + SAT + HSGPA | status ~ LowSES + grade + LowSES:grade + SAT + HSGPA | 1.00   | 12 | 0.0   | 30628.5 | -15302.2 |
|                                                      | status ~ LowSES + grade + LowSES:grade + SAT         | 0.00   | 10 | 53.2  | 30681.7 | -15330.9 |
| status ~ URM + grade + URM:grade                     | status ~ URM + grade + URM:grade                     | 1.00   | 8  | 0.0   | 30918.6 | -15451.3 |
| status ~ Women + grade + Women:grade                 | status ~ Women + grade + Women:grade                 | 1.00   | 8  | 0.0   | 30822.3 | -15403.1 |
| status ~ FGN + grade + FGN:grade                     | status ~ FGN + grade + FGN:grade                     | 0.92   | 8  | 0.0   | 30992.1 | -15488.0 |
|                                                      | status ~ FGN + grade                                 | 0.08   | 6  | 4.9   | 30997.0 | -15492.5 |
|                                                      | status ~ grade                                       | 0.00   | 4  | 37.8  | 31029.9 | -15511.0 |
| status ~ LowSES + grade + LowSES:grade               | status ~ LowSES + grade + LowSES:grade               | 1.00   | 8  | 0.0   | 30830.8 | -15407.4 |



## REFERENCES AND NOTES

1. E. M. Bensimon, Closing the achievement gap in higher education: An organizational learning perspective. *New Dir. High. Educ.* **2005**, 99–111 (2005).
2. B. Spitzer, J. Aronson, Minding and mending the gap: Social psychological interventions to reduce educational disparities. *Brit. J. Educ. Psychol.* **85**, 1–18 (2015).
3. D. C. Haak, J. HilleRisLambers, E. Pitre, S. Freeman, Increased structure and active learning reduce the achievement gap in introductory biology. *Science* **332**, 1213–1216 (2011).
4. R. L. Matz, B. P. Koester, S. Fiorini, G. Grom, L. Shepard, C. G. Stangor, B. Weiner, T. A. McKay, Patterns of gendered performance differences in large introductory courses at five research universities. *AERA Open* **3**, 1–12 (2017).
5. C. Alexander, E. Chen, K. Grumbach, How leaky is the health career pipeline? Minority student achievement in college gateway courses. *Acad. Med.* **84**, 797–802 (2009).
6. National Academies of Sciences, Engineering, and Medicine, *Barriers and Opportunities for 2-Year and 4-Year STEM Degrees: Systemic Change to Support Students' Diverse Pathways* (The National Academies Press, 2016).
7. National Center for Educational Statistics, *Status and Trends in the Education of Racial and Ethnic Groups, Indicator 26: STEM Degrees* (U.S. Department of Education, 2019).
8. S. L. Dika, M. M. D'Amico, Early experiences and integration in the persistence of first-generation college students in STEM and non-STEM majors. *J. Res. Sci. Teach.* **53**, 368–383 (2016).
9. President's Council of Advisors on Science and Technology, *Engage to Excel: Producing One Million Additional College Graduates with Degrees in Science, Technology, Engineering, and Mathematics* (Executive Office of the President, 2012).
10. S. S. Levine, E. P. Apfelbaum, M. Bernard, V. L. Bartelt, E. J. Zajac, D. Stark, Ethnic diversity deflates price bubbles. *Proc. Natl. Acad. Sci. U.S.A.* **111**, 18524–18529 (2014).

11. P. M. DiBartolo, L. Gregg-Jolly, D. Gross, C. A. Manduca, E. Iverson, D. B. Cooke III, G. K. Davis, C. Davidson, P. E. Hertz, L. Hubbard, S. K. Ireland, C. Mader, A. Pai, S. Raps, K. Siwicki, J. E. Swartz, Principles and practices fostering inclusive excellence: Lessons from the Howard Hughes Medical Institute's capstone institutions. *CBE Life Sci. Educ.* **15**, ar44 (2016).
12. D. A. Barr, J. Matsui, S. F. Wanat, M. E. Gonzalez, Chemistry courses as the turning point for premedical students. *Adv. Health Sci. Educ.* **15**, 45–54 (2010).
13. R. W. Fairlie, F. Hoffmann, P. Oreopoulos, A community college instructor like me: Race and ethnicity interactions in the classroom. *Am. Econ. Rev.* **104**, 2567–2591 (2014).
14. M. M. Chingos, Instructional quality and student learning in higher education: Evidence from developmental algebra courses. *J. Higher Educ.* **87**, 84–114 (2016).
15. M. C. Jackson, G. Galvez, I. Landa, P. Buonara, D. B. Thoman, Science that matters: The importance of a cultural connection in underrepresented students' science pursuit. *CBE Life Sci. Educ.* **15**, ar42 (2016).
16. L. I. Rendón, A. Nora, R. Bledsoe, V. Kanagala, *Científicos Latinxs: The Untold Story of Underserved Student Success in STEM Fields of Study* (Center for Research and Policy in Education, University of San Antonio, 2019).
17. J. Ellis, B. K. Fosdick, C. Rasmussen, Women 1.5 times more likely to leave STEM pipeline after calculus compared to men: Lack of mathematical confidence a potential culprit. *PLOS ONE* **11**, e0157447 (2016).
18. K. Rask, J. Tiefenthaler, The role of grade sensitivity in explaining the gender imbalance in undergraduate economics. *Econ. Educ. Rev.* **27**, 676–687 (2008).
19. C. S. Rozek, G. Ramirez, R. D. Fine, S. L. Beilock, Reducing socioeconomic disparities in the STEM pipeline through student emotion regulation. *Proc. Natl. Acad. Sci. U.S.A.* **116**, 1553–1558 (2019).

20. R. Shedlosky-Shoemaker, J. M. Fautch, Who leaves, who stays? Psychological predictors of undergraduate chemistry students' persistence. *J. Chem. Educ.* **92**, 408–414 (2015).
21. A. Bandura, The explanatory and predictive scope of self-efficacy theory. *J. Soc. Clin. Psychol.* **4**, 359–373 (1986).
22. J. Y. K. Chan, C. G. Bauer, Identifying at-risk students in general chemistry via cluster analysis of affective characteristics. *J. Chem. Educ.* **91**, 1417–1425 (2014).
23. S. M. Villafañe, C. A. Garcia, J. E. Lewis, Exploring diverse students' trends in chemistry self-efficacy throughout a semester of college-level preparatory chemistry. *Chem. Educ. Res. Pract.* **15**, 114–127 (2014).
24. C. M. Steele, J. Aronson, Stereotype threat and the intellectual test performance of African-Americans. *J. Pers. Soc. Psych.* **69**, 797–811 (1995).
25. G. L. Cohen, J. Garcia, N. Apfel, A. Master, Reducing the racial achievement gap: A social-psychological intervention. *Science* **313**, 1307–1310 (2006).
26. A. Miyake, L. E. Kost-Smith, N. D. Finkelstein, S. J. Pollock, G. L. Cohen, T. A. Ito, Reducing the gender achievement gap in college science: A classroom study of values affirmation. *Science* **330**, 1234–1237 (2010).
27. H. Jordt, S. L. Eddy, R. Brazil, I. Lau, C. Mann, S. E. Brownell, K. King, S. Freeman, Values affirmation intervention reduces achievement gap between underrepresented minority and white students in introductory biology classes. *CBE Life Sci. Educ.* **16**, ar41 (2017).
28. E. J. Theobald, M. J. Hill, E. Tran, S. Agrawal, E. N. Arroyo, S. Behling, N. Chambwe, D. Laboy Cintrón, J. D. Cooper, G. Dunster, J. A. Grummer, K. Hennessey, J. Hsiao, N. Iranon, L. Jones II, H. Jordt, M. Keller, M. Lacey, C. E. Littlefield, A. Lowe, S. Newman, V. Okolo, S. Olroyd, B. R. Peacock, S. B. Pickett, D. L. Slager, I. W. Caviedes-Solis, K. E. Stanchak, V. Sundaravardan, C. Valdebenito, C. R. Williams, K. Zinsli, S. Freeman, Active learning narrows achievement gaps for underrepresented students in science, technology, engineering, and math. *Proc. Natl. Acad. Sci. U.S.A.* **117**, 6476–6483 (2020).

29. M. Estrada, A. Eroy-Reveles, J. Matsui, The influence of affirming kindness and community on broadening participation in STEM career pathways. *Soc. Iss. Pol. Rev.* **12**, 258–297 (2018).
30. K. Rainey, M. Dancy, R. Mickelson, E. Stearns, S. Moller, A descriptive study of race and gender differences in how instructional style and perceived professor care influence decisions to major in STEM. *Int. J. STEM Educ.* **6**, 6 (2019).
31. M. Stains, J. Harshman, M. K. Barker, S. V. Chasteen, R. Cole, S. E. DeChenne-Peters, M. K. Eagan Jr., J. M. Esson, J. K. Knight, F. A. Laski, M. Levis-Fitzgerald, C. J. Lee, S. M. Lo, L. M. McDonnell, T. A. McKay, N. Michelotti, A. Musgrove, M. S. Palmer, K. M. Plank, T. M. Rodela, E. R. Sanders, N. G. Schimpf, P. M. Schulte, M. K. Smith, M. Stetzer, B. Van Valkenburgh, E. Vinson, L. K. Weir, P. J. Wendel, L. B. Wheeler, A. M. Young, Anatomy of STEM teaching in North American universities. *Science* **359**, 1468–1470 (2018).
32. M. Cooper, M. Klymkowsky, Chemistry, life, the universe, and everything: A new approach to general chemistry and a model for curricular reform. *J. Chem. Educ.* **90**, 1116–1122 (2013).
33. B. Uttl, C. A. White, D. W. Gonzalez, Meta-analysis of faculty’s teaching effectiveness: Student evaluation of teaching ratings and student learning are not related. *Stud. Educ. Eval.* **54**, 22–42 (2017).
34. M. A. Deri, P. Mills, D. McGregor, Structure and evaluation of a flipped general chemistry course as a model for small and large gateway science courses at an urban public institution. *J. Coll. Sci. Teach.* **47**, 68–77 (2018).
35. C. A. Stanich, M. A. Pelch, E. J. Theobald, S. Freeman, A new approach to supplementary instruction narrows achievement and affect gaps for underrepresented minorities, first-generation students, and women. *Chem. Educ. Res. Pract.* **19**, 846–866 (2018).
36. K. D. Gibbs Jr., P. Marsteller, Broadening participation in the life sciences: Current landscape and future directions. *CBE Life Sci. Educ.* **15**, ed1 (2016).
37. E. Theobald, Students are rarely independent: When, why, and how to use random effects in discipline-based education research. *CBE Life Sci. Educ.* **17**, rm2 (2018).

38. A. F. Zuur, E. N. Ieno, N. J. Walker, A. A. Saveliev, G. M. Smith, *Mixed Effects Models and Extensions in Ecology with R* (Springer, 2009).
39. R Core Team, *A Language and Environment for Statistical Computing* (R Foundation for Statistical Computing, 2019).
40. D. F. Halpern, C. P. Benbow, D. C. Geary, R. C. Gur, J. S. Hyde, M. A. Gernsbacher, The science of sex differences in science and mathematics. *Psychol. Sci. Public Interest* **8**, 1–51 (2007).
